# Supplementary material for: The first synthesis of (−)-isoambreinolide, (+)-vitexifolin D and (+)-vitedoin B
Source: Royal Society of Chemistry journal article supplement (doi:10.1039/c3ob42122h), 2013-11-20

## **Electronic Supplementary Information (ESI)**

### **First synthesis of (-)-isoambreinolide, (+)-vitexifolin D and (+)-vitedoin B**

Hanane Bouanou, Rubén Tapia, M. José Cano, Jose M. Ramos, Esteban Alvarez, Etthair Boulifa, Abdelaziz Dahdouh, Ahmed I. Mansour, Ramón Alvarez-Manzaneda, Rachid Chahboun\* and Enrique Alvarez-Manzaneda\*

*\*Departamento de Química Orgánica, Facultad de Ciencias, Instituto de Biotecnología, Universidad de Granada, 18071 Granada, Spain.*

[rachid@ugr.es](mailto:rachid@ugr.es); [eamr@ugr.es](mailto:eamr@ugr.es)

### **Contents**

|                                                      |       |
|------------------------------------------------------|-------|
| <sup>1</sup> H and <sup>13</sup> C NMR Spectra ..... | 2-.35 |
|------------------------------------------------------|-------|

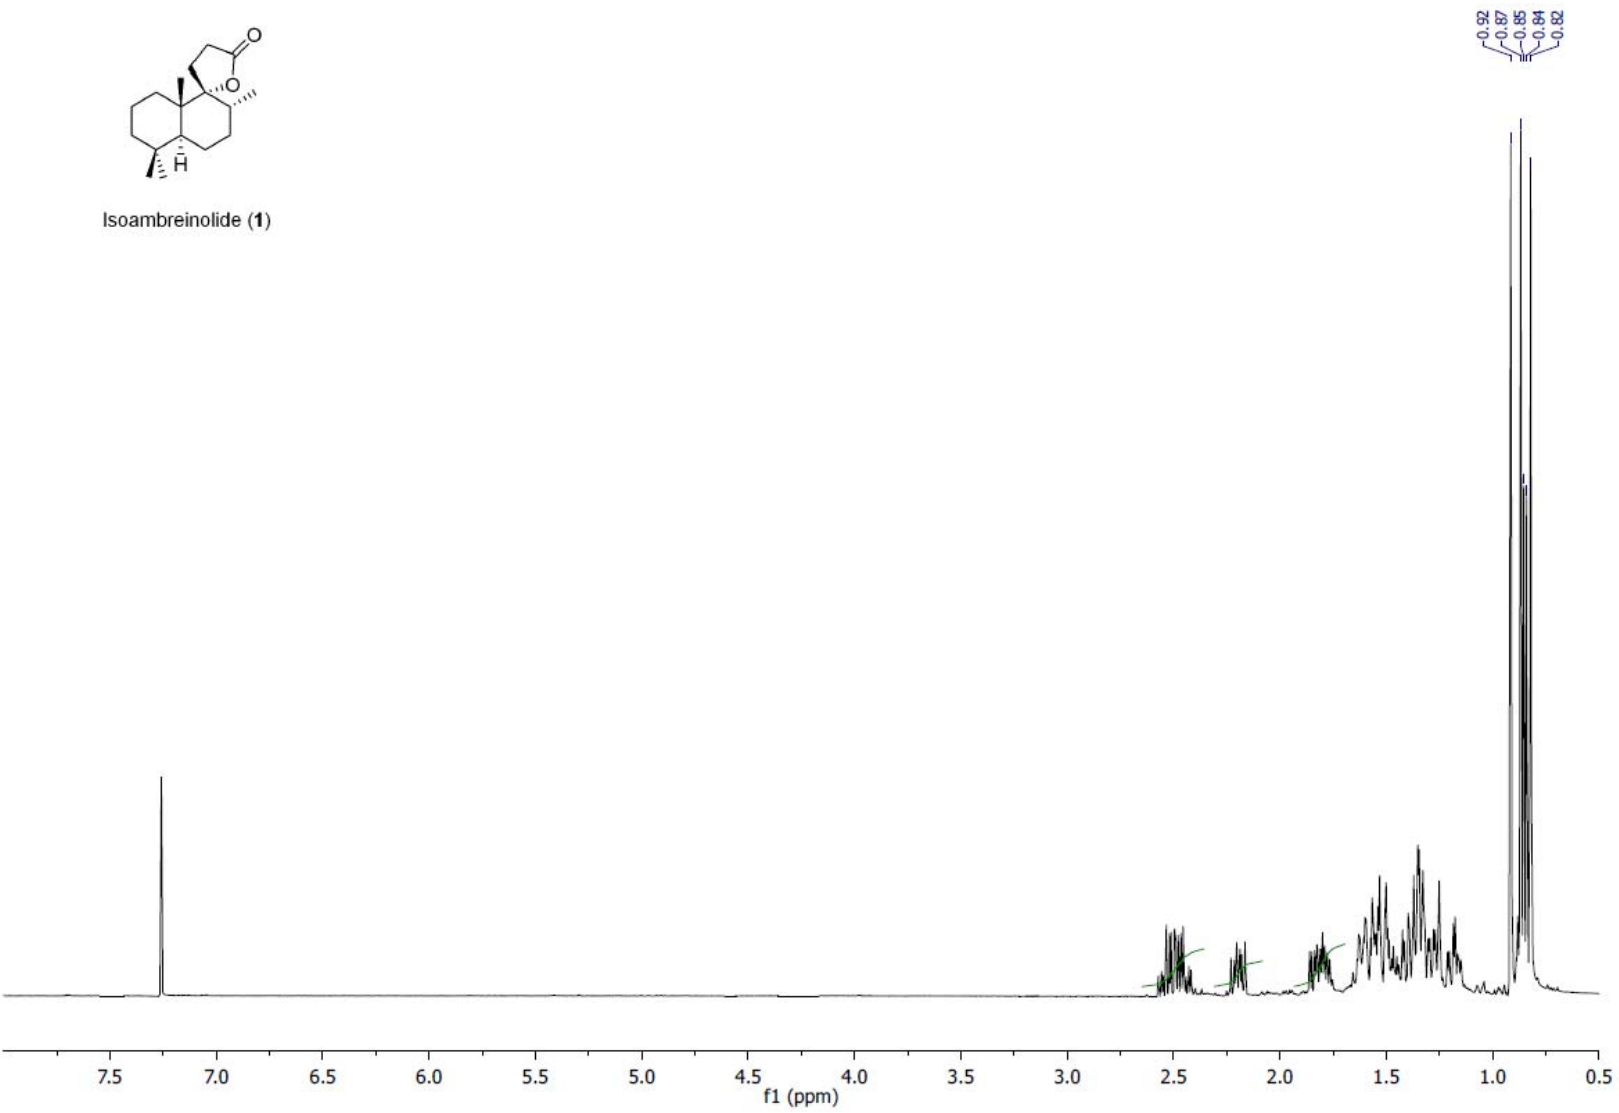

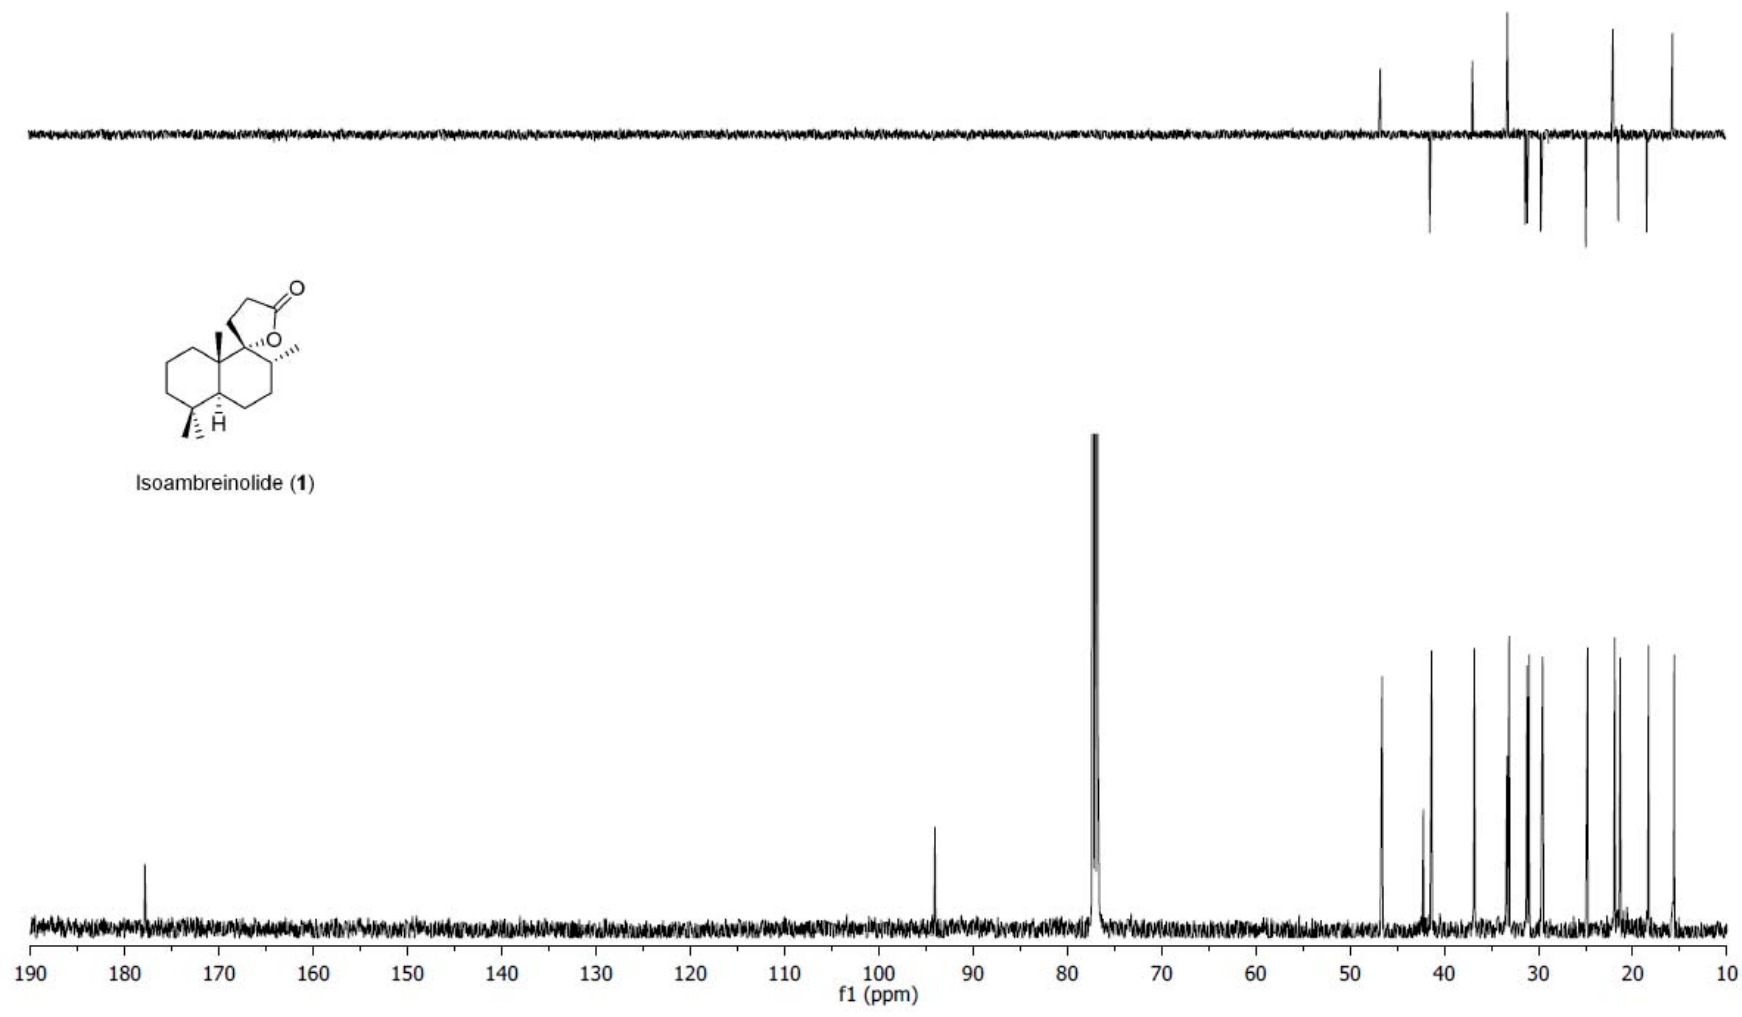

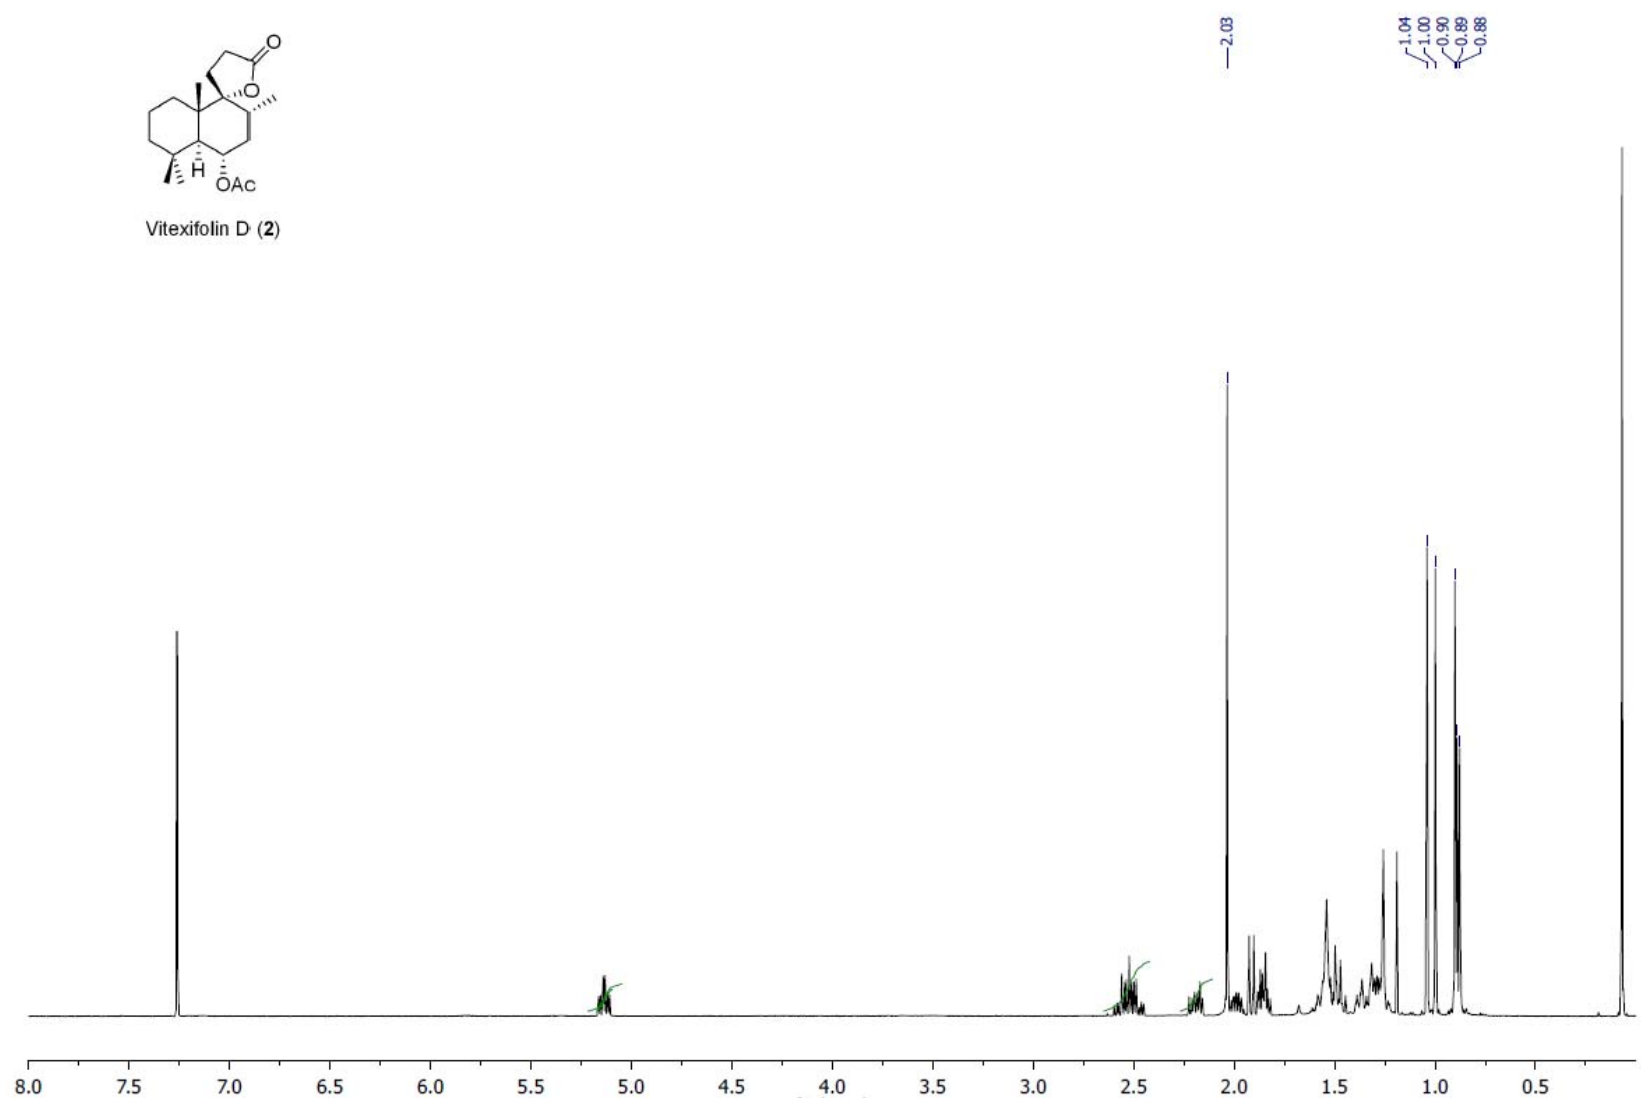

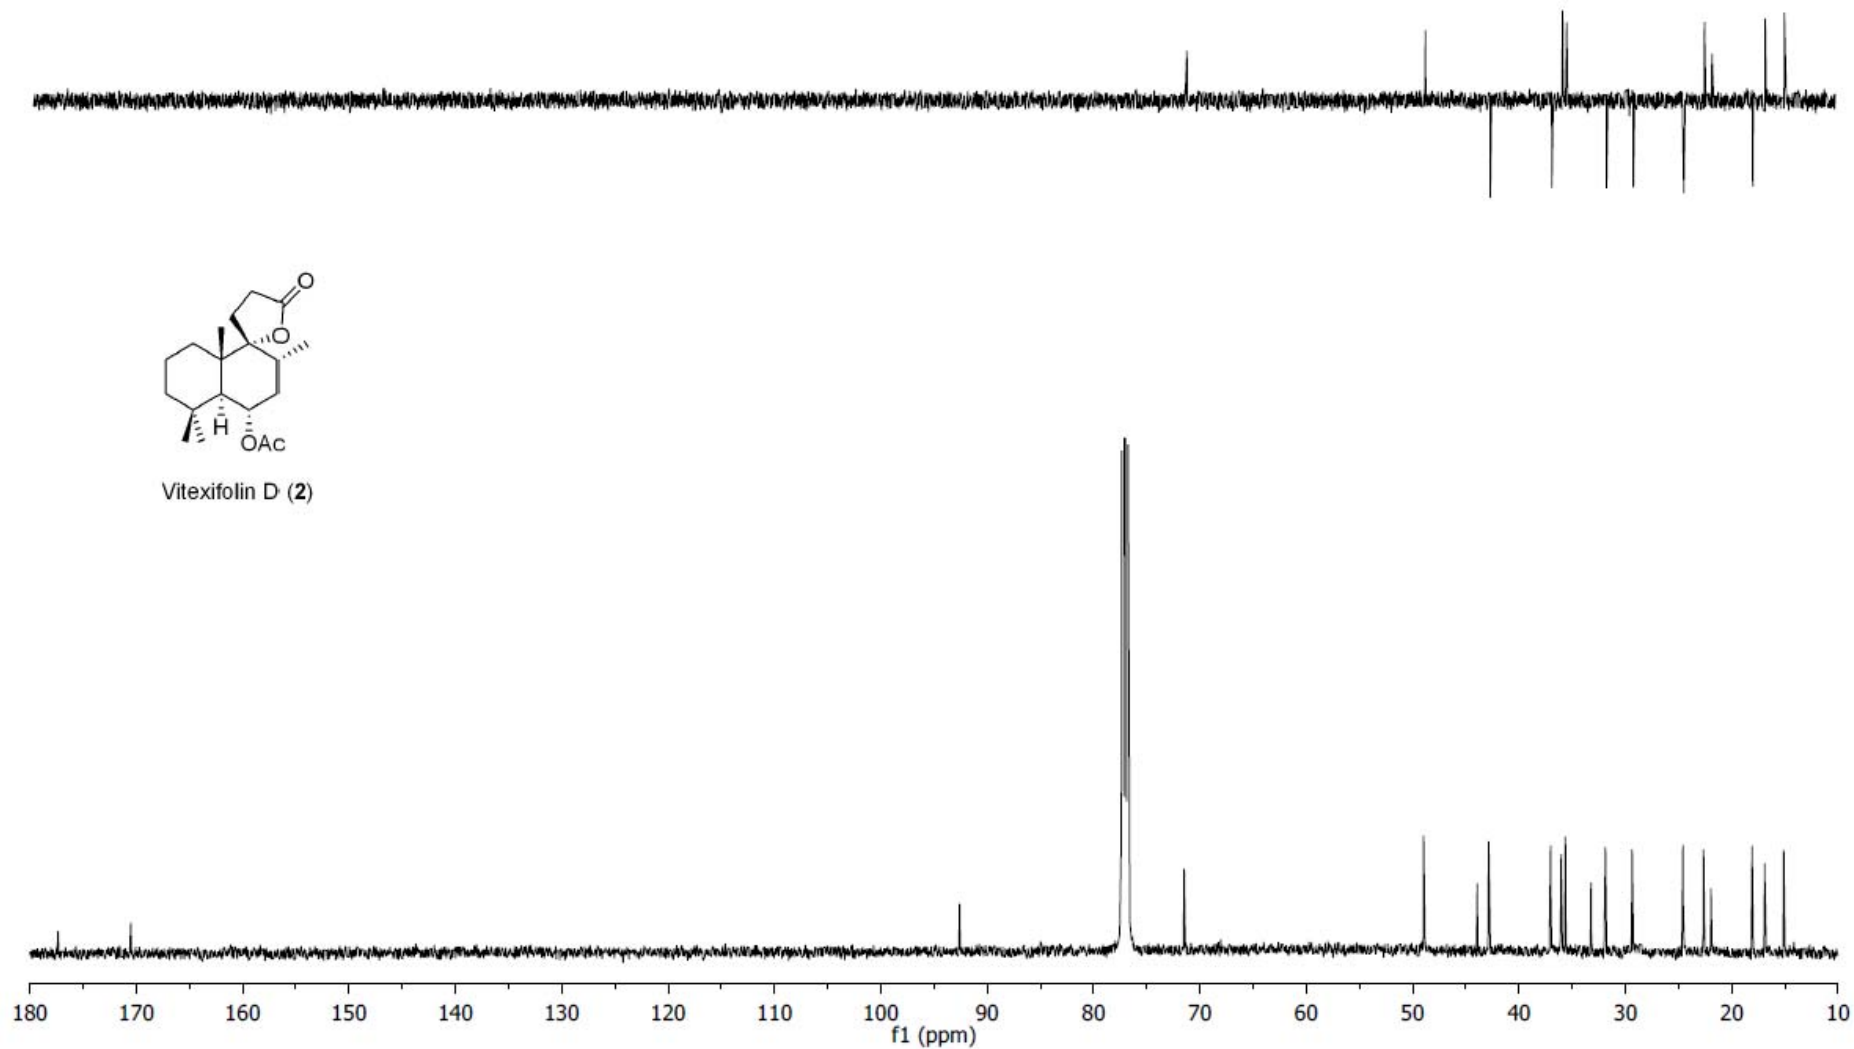

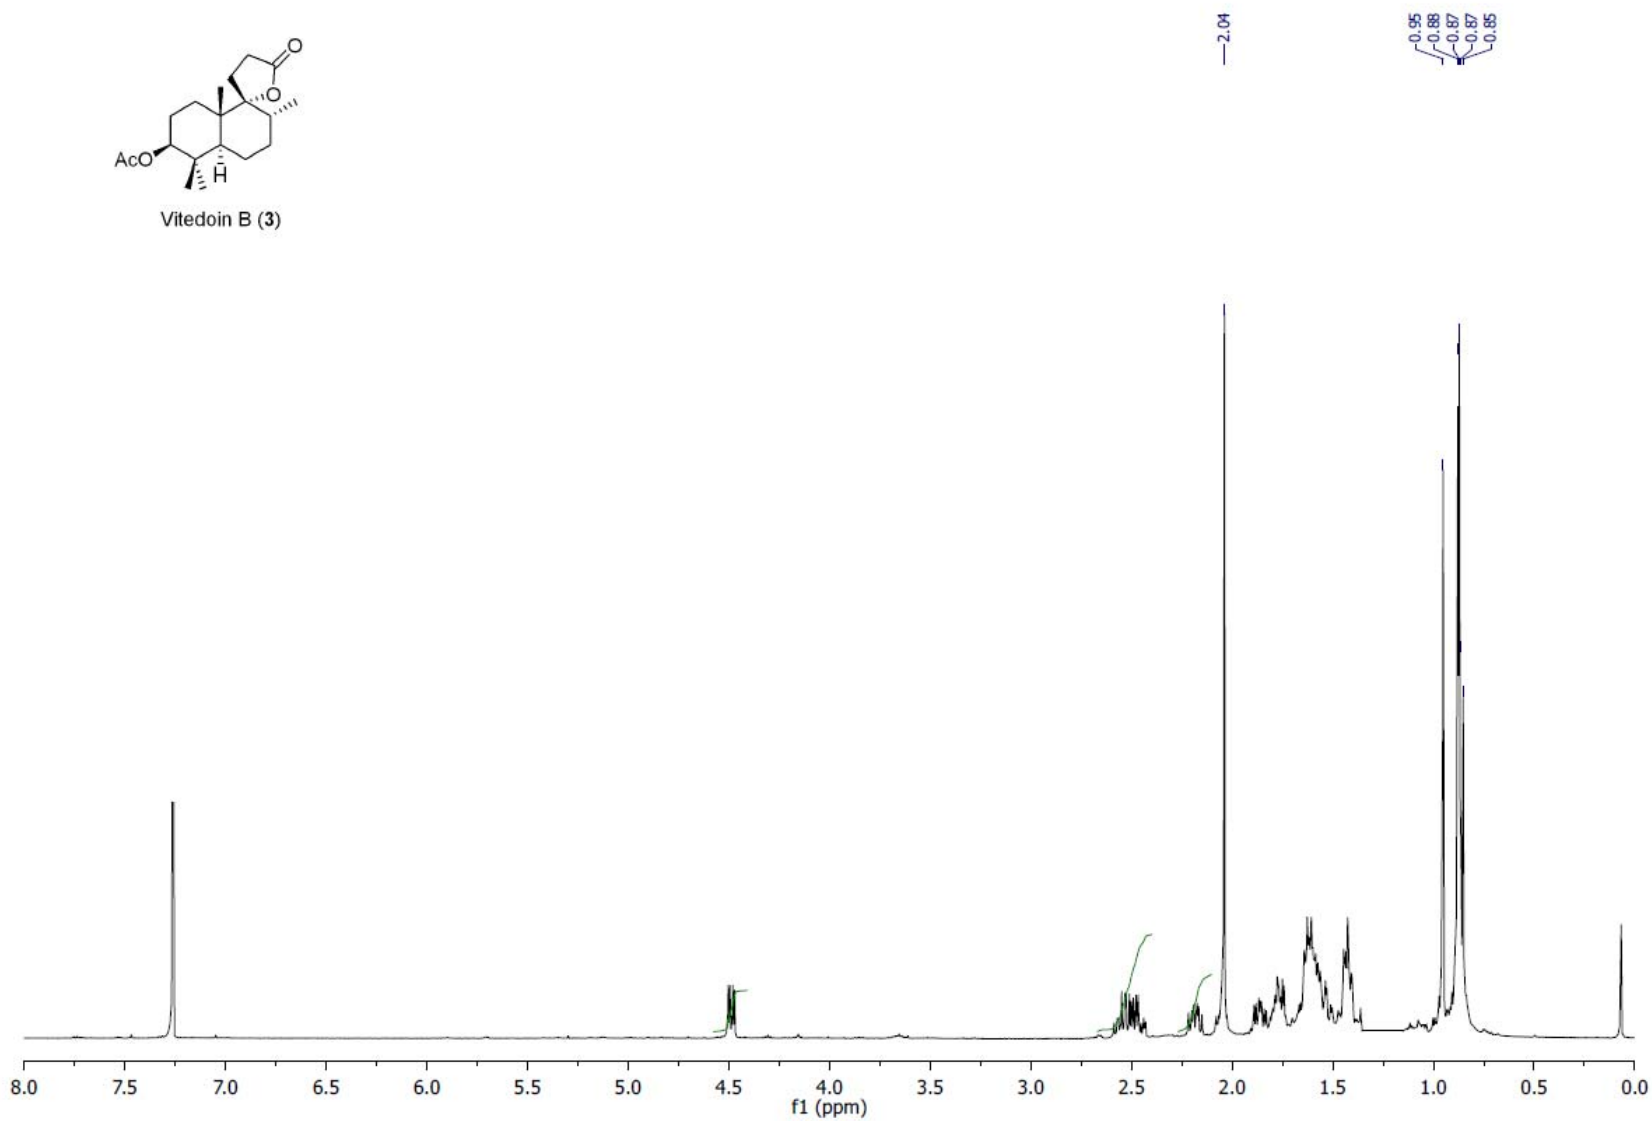

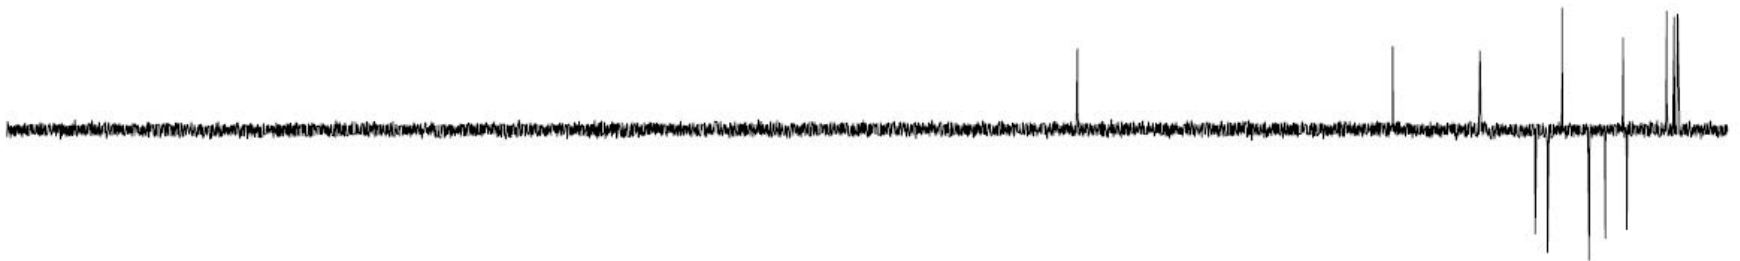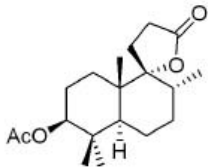

Vitedoin B (3)

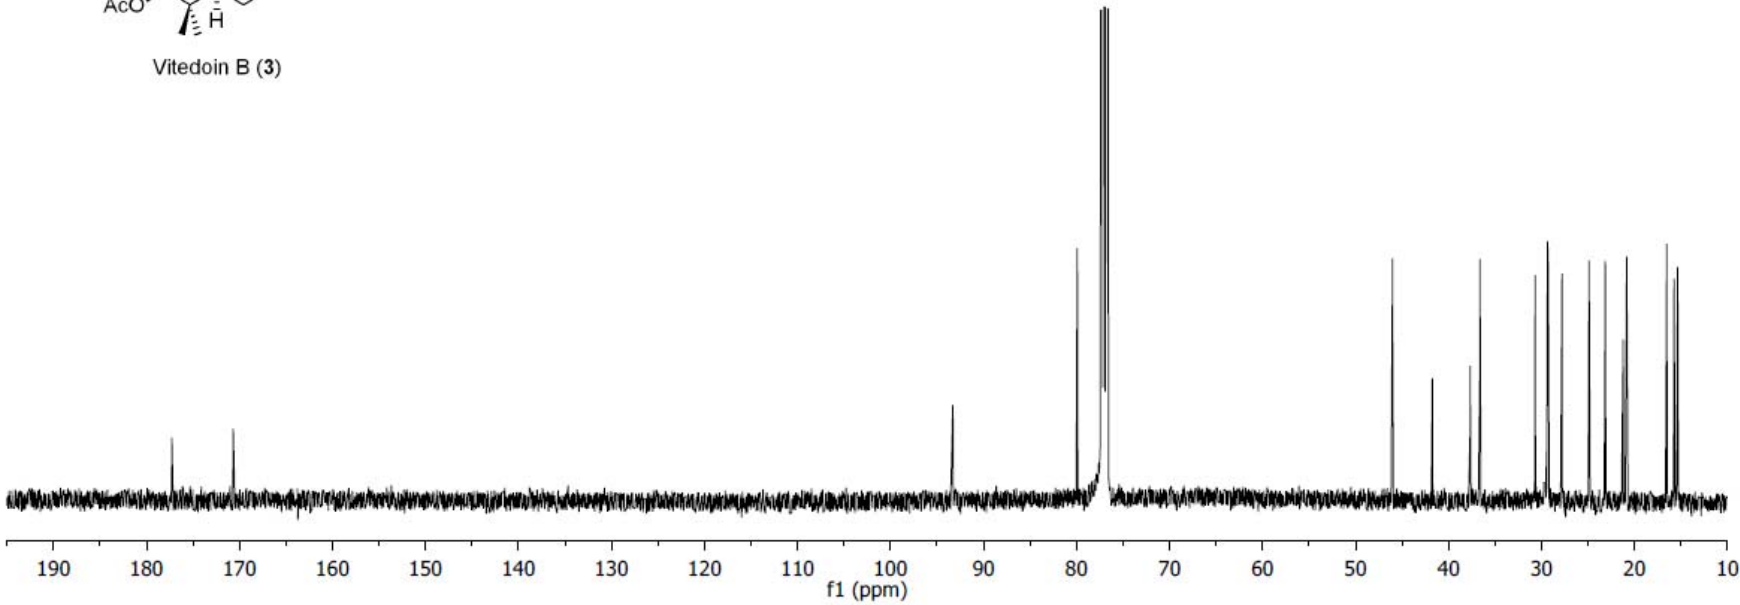

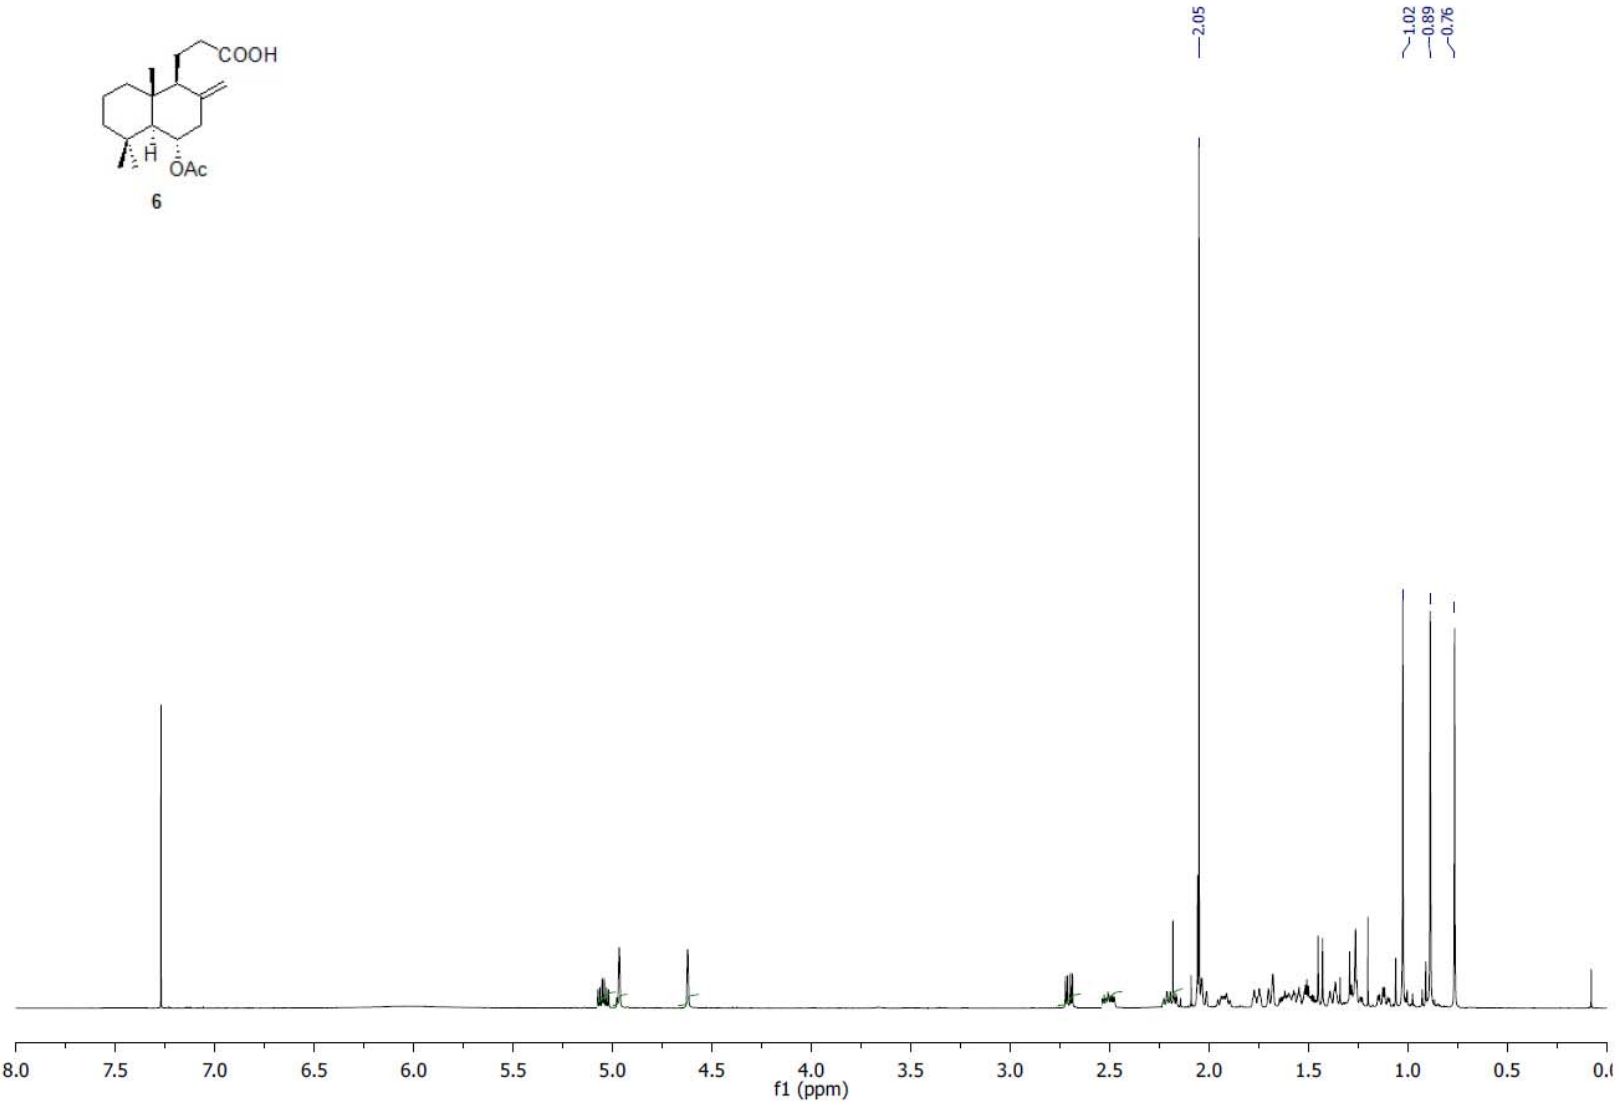



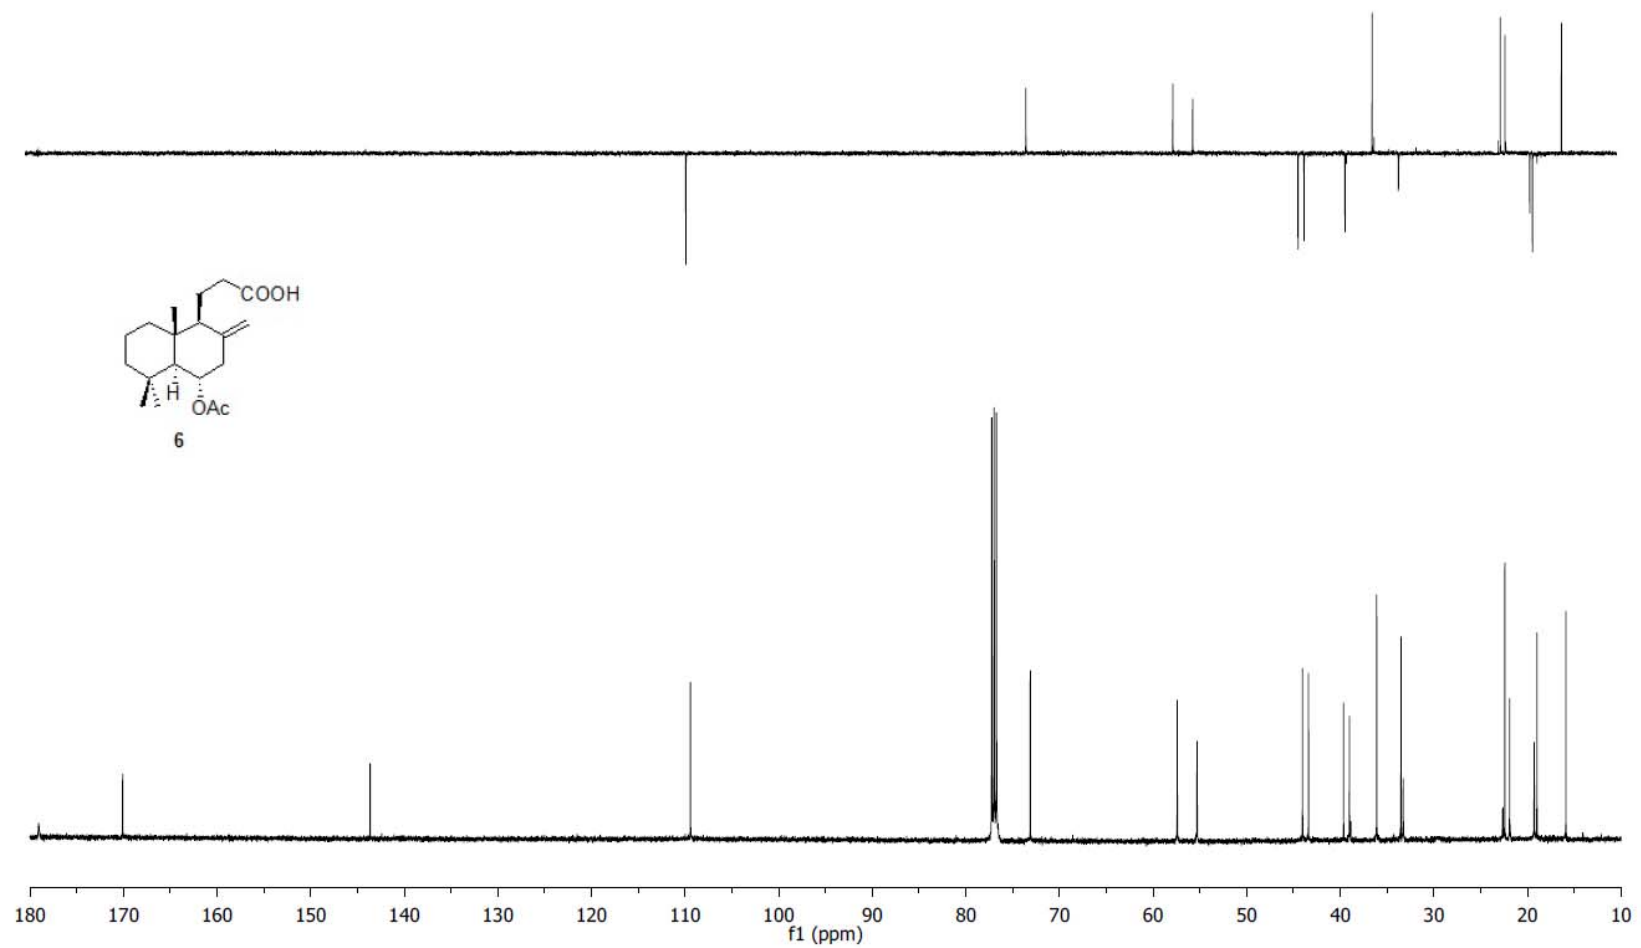

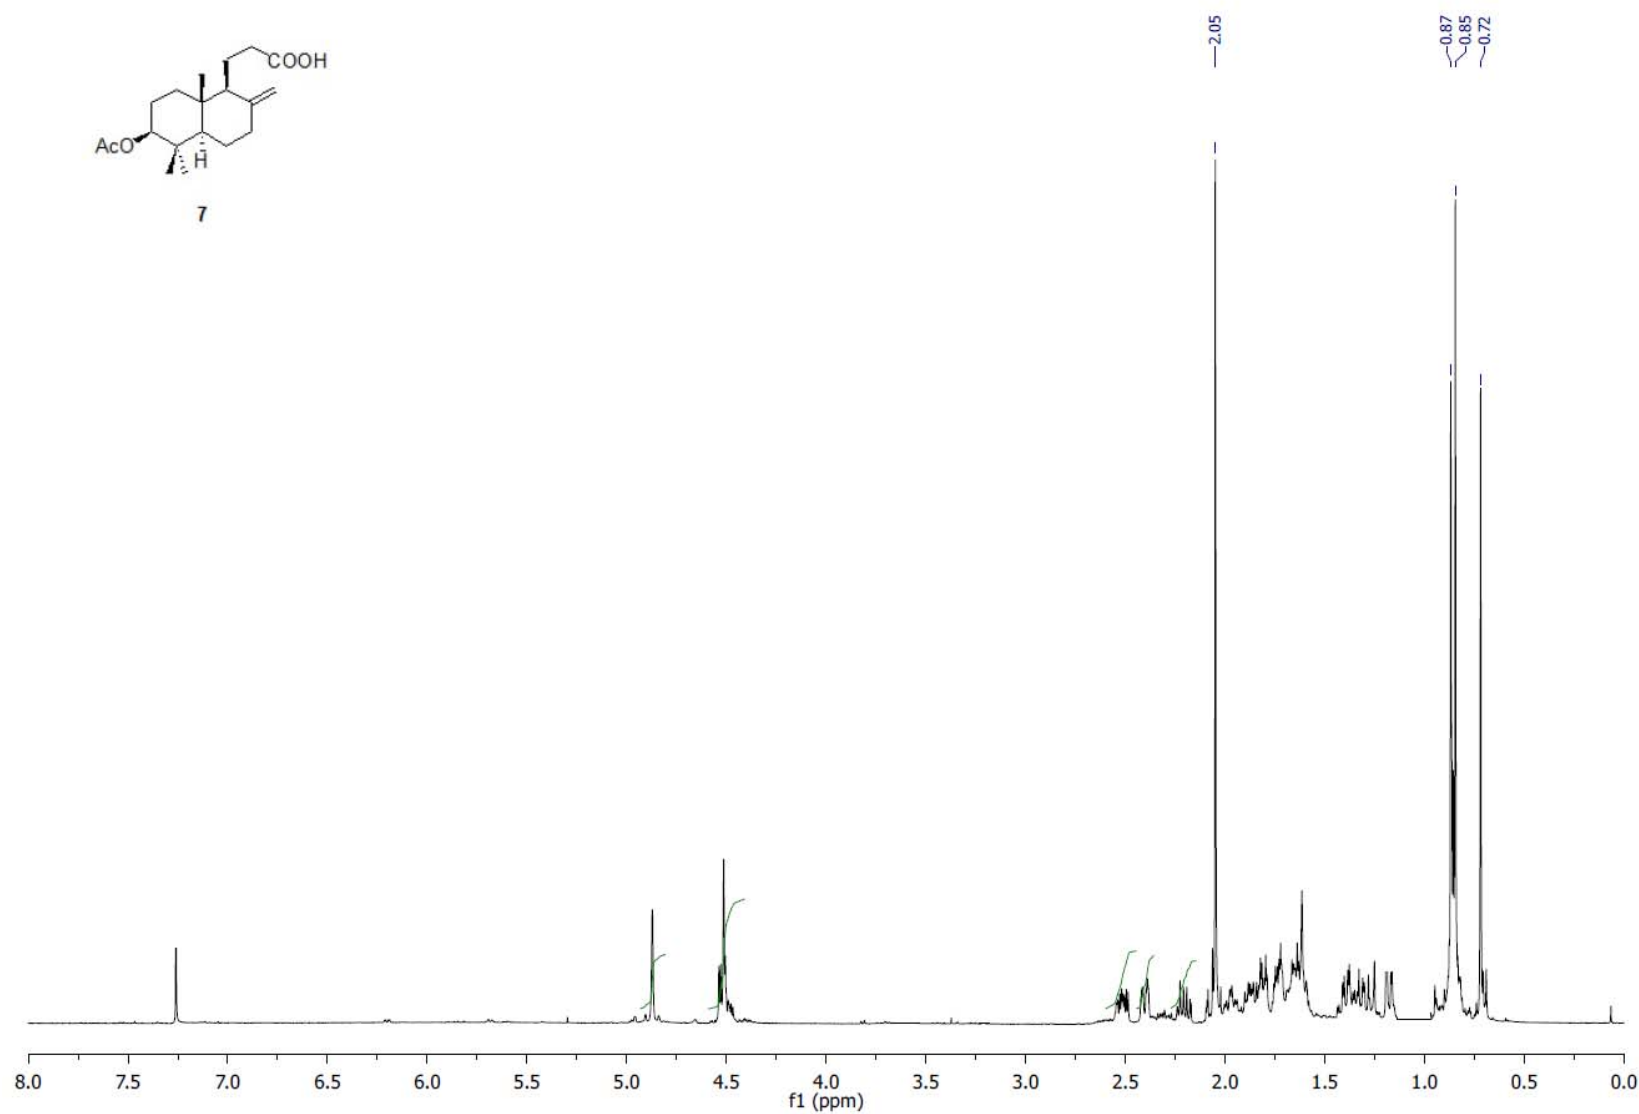

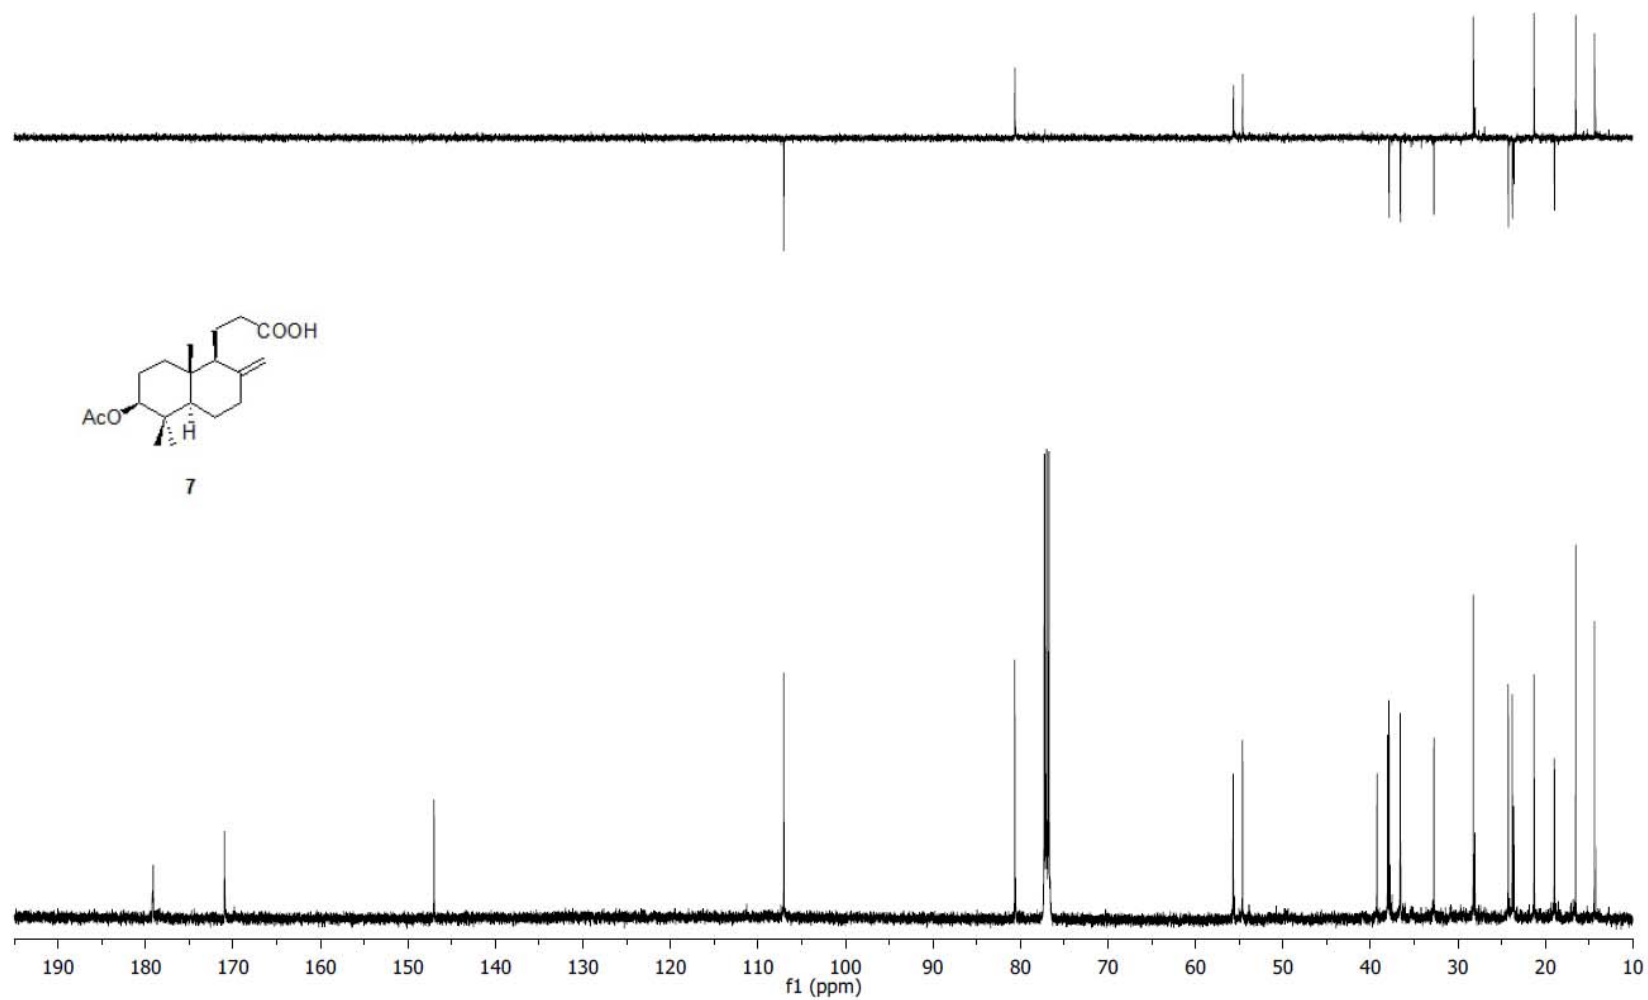

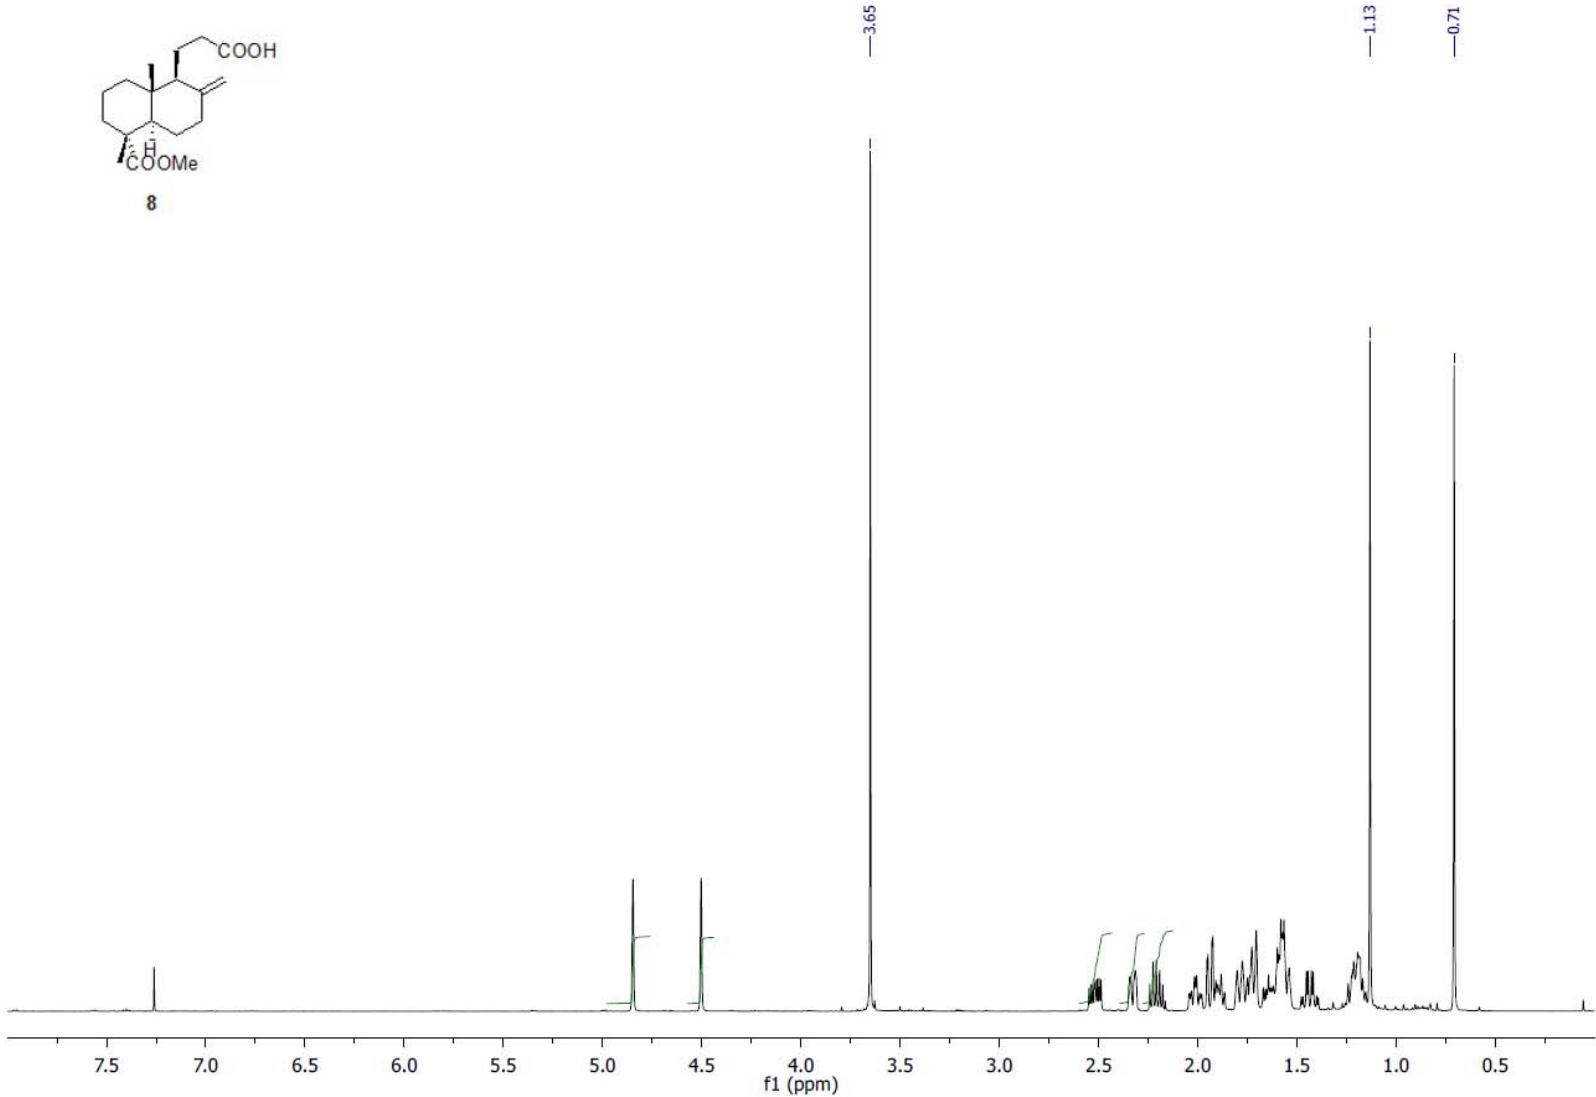

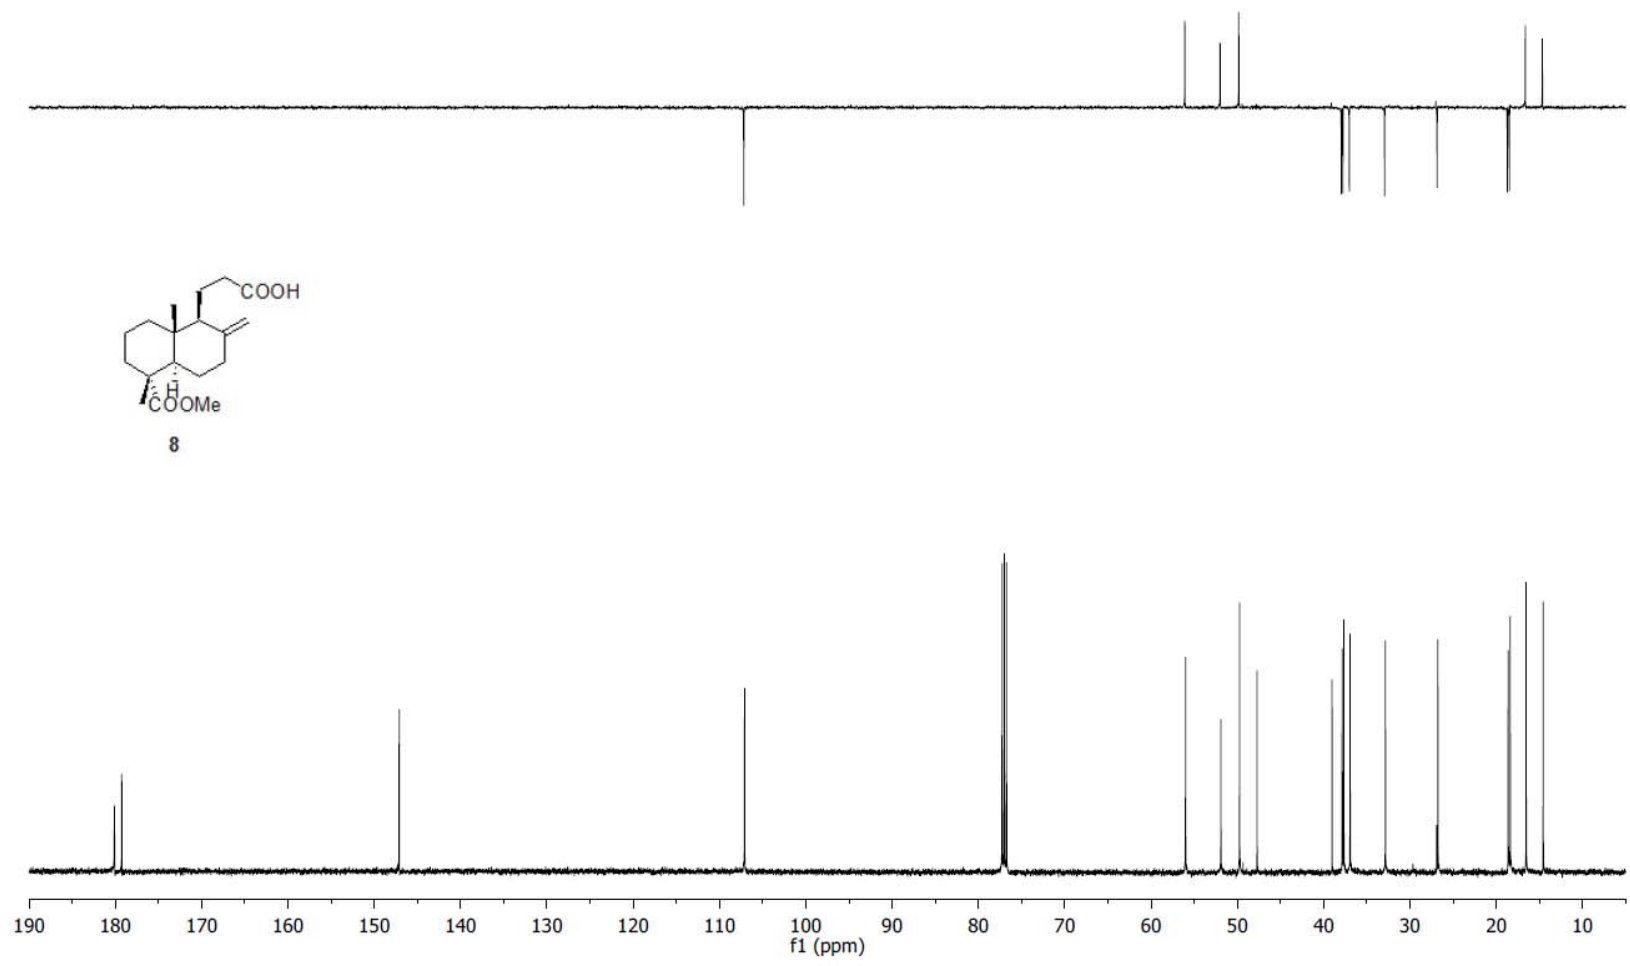

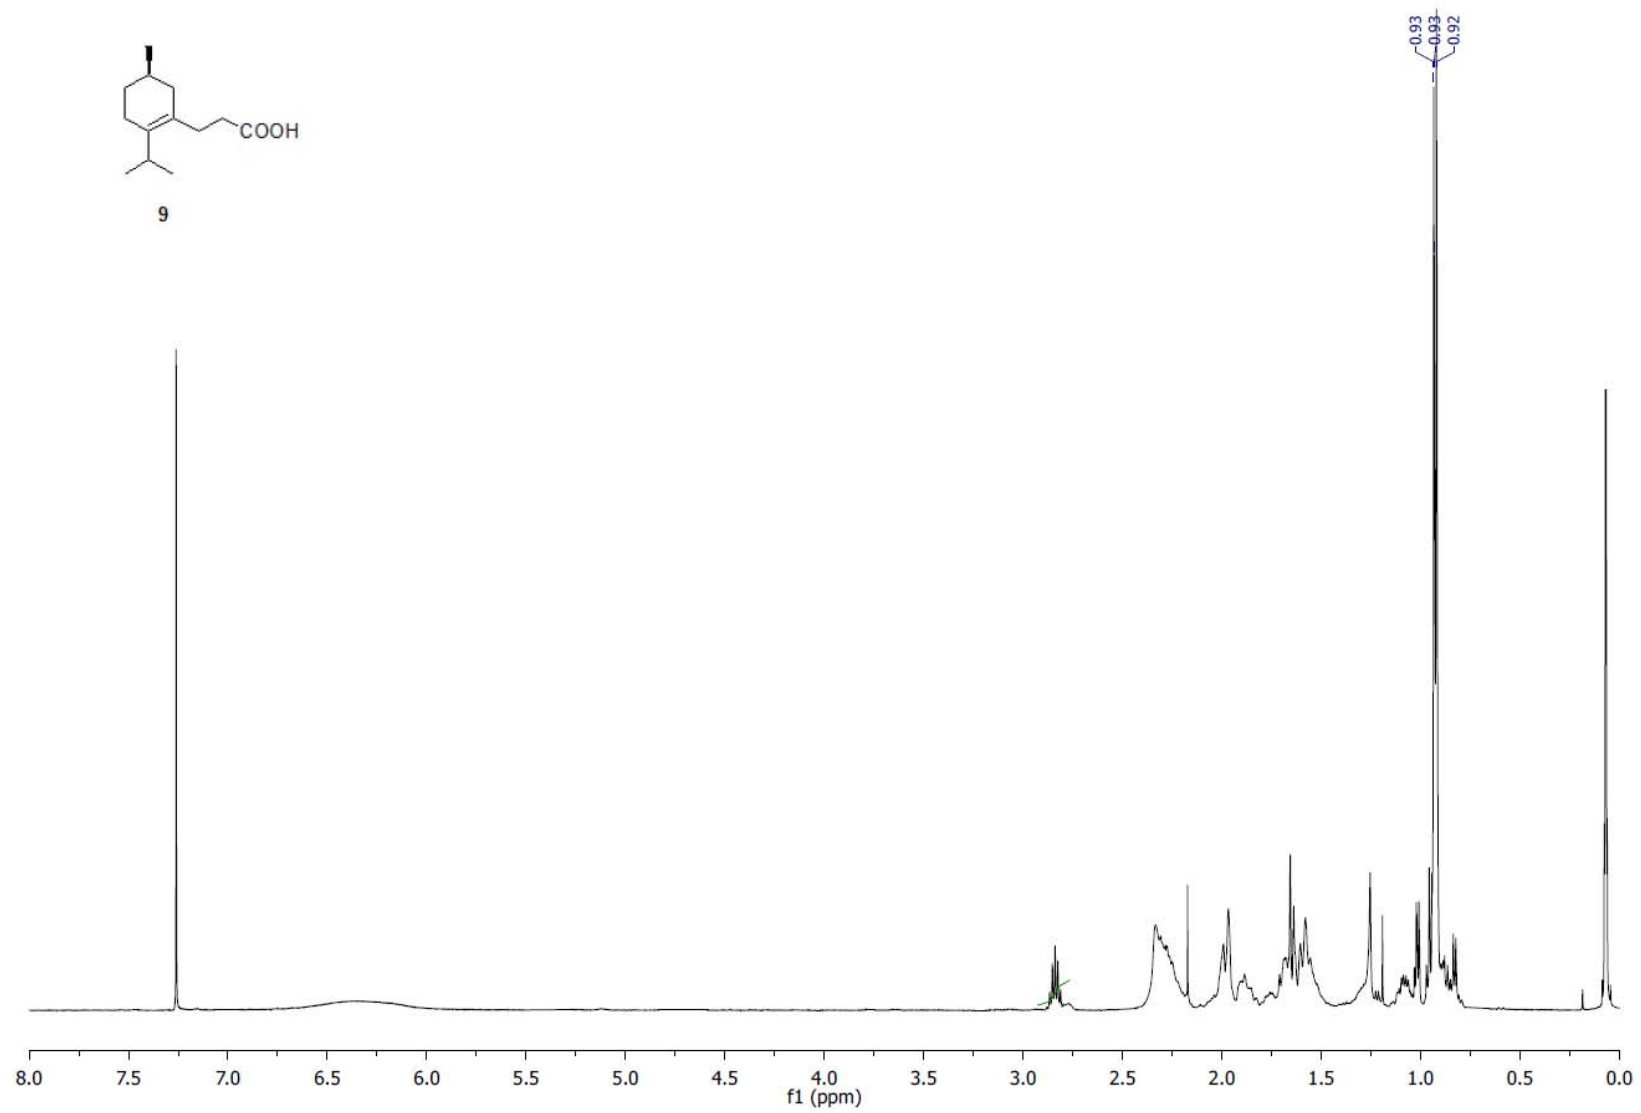

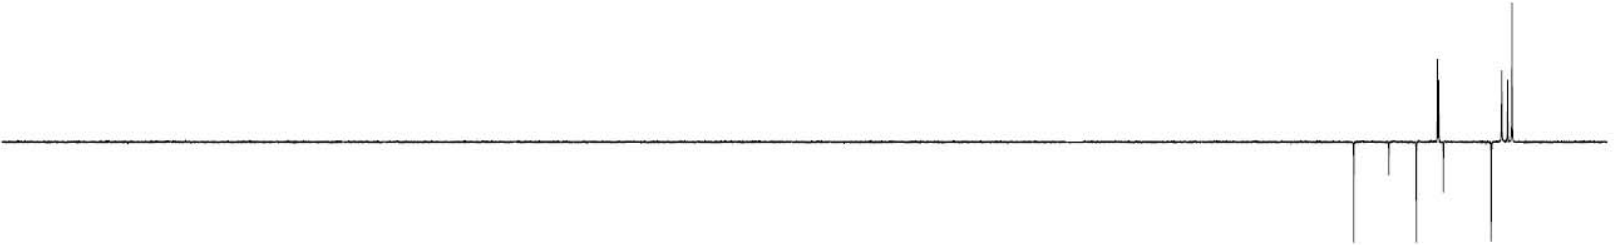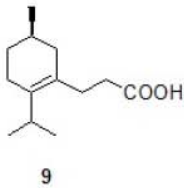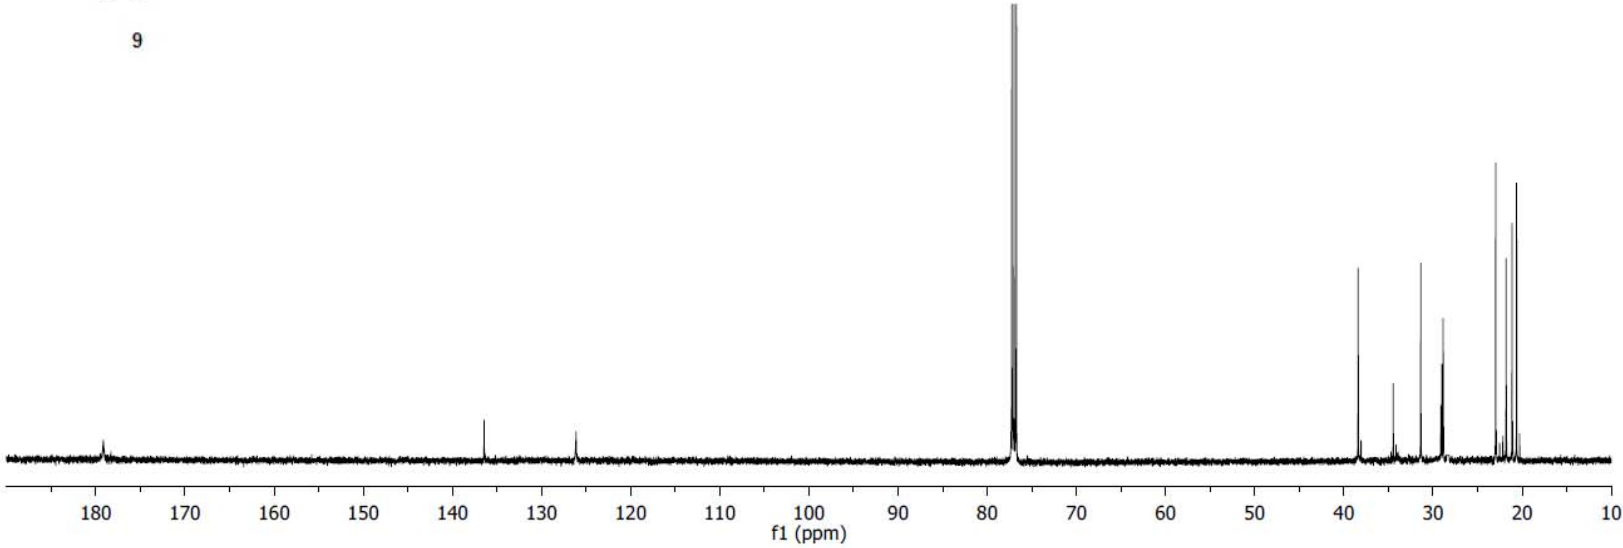

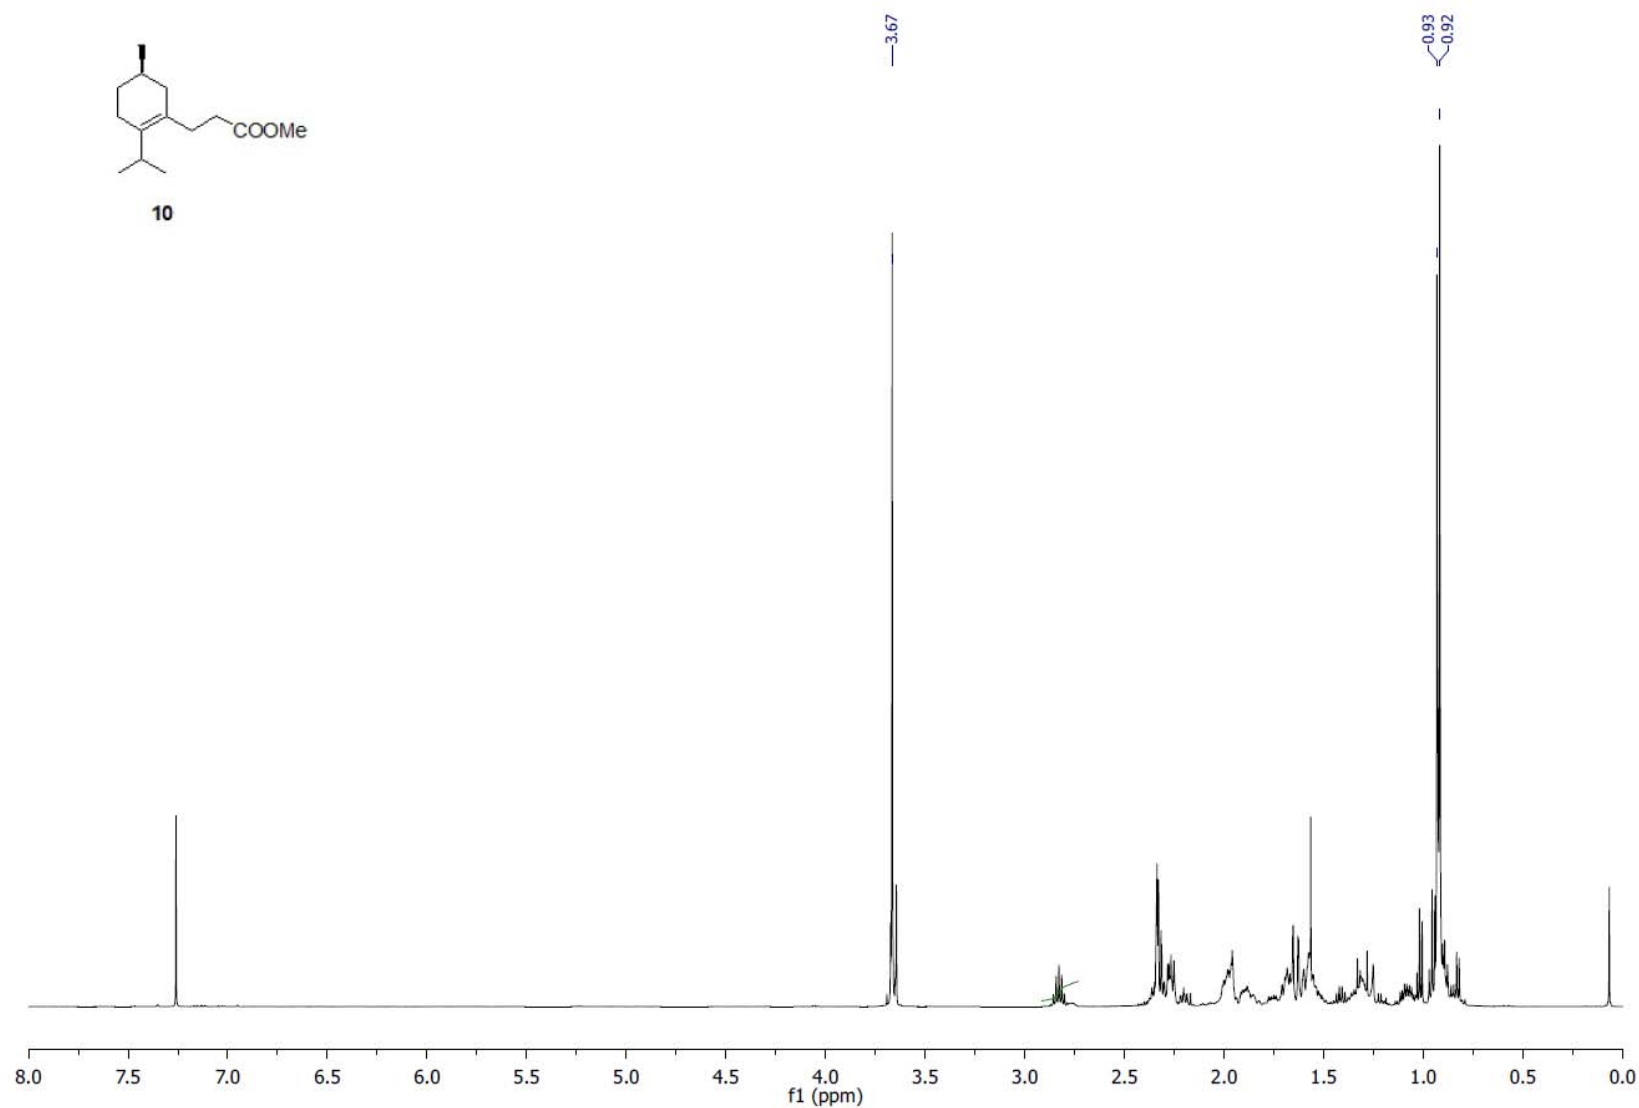



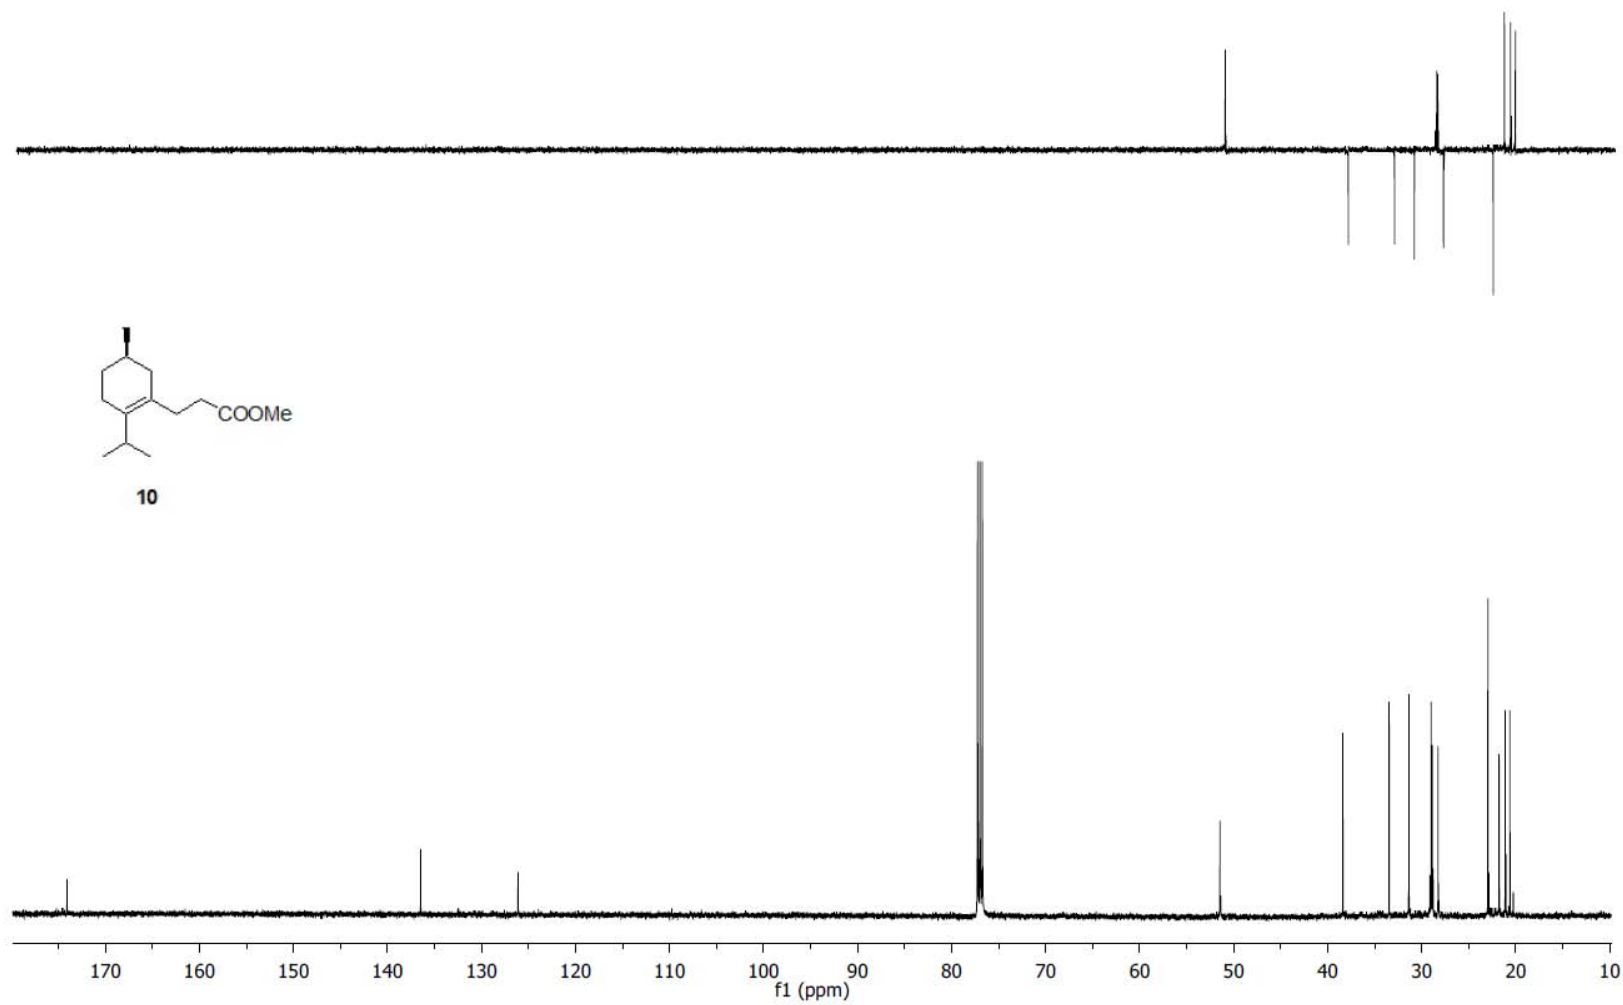

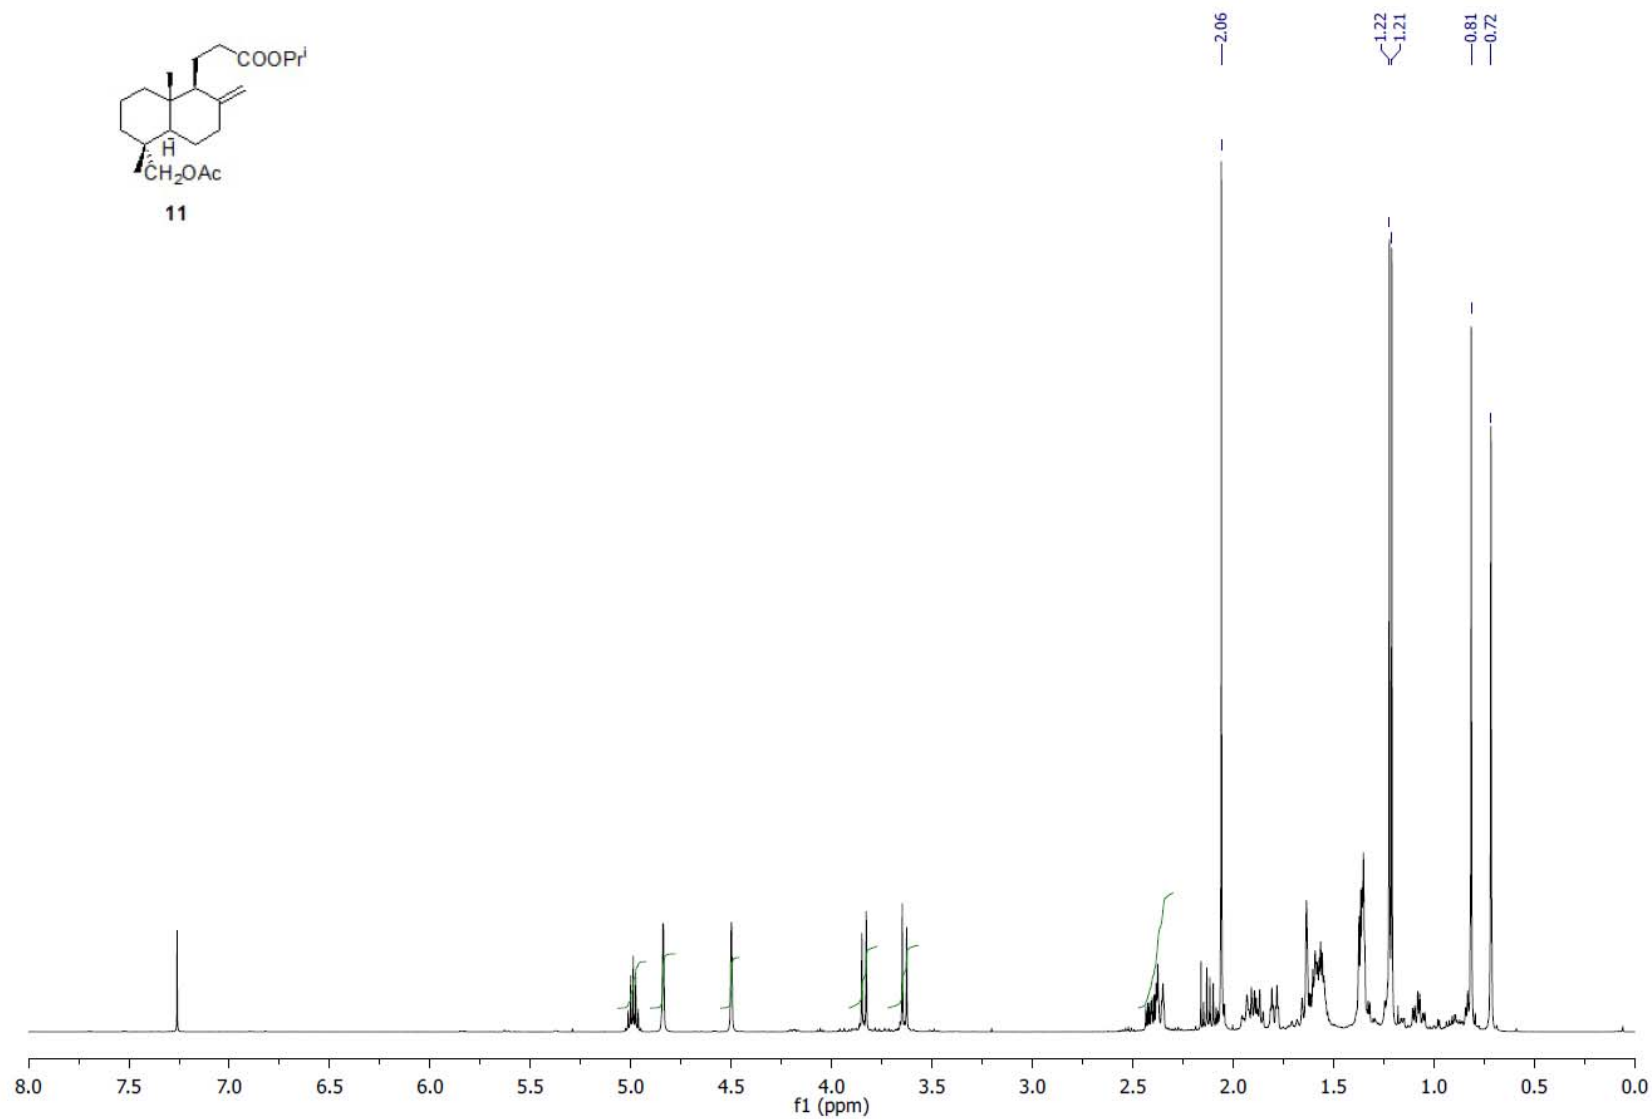

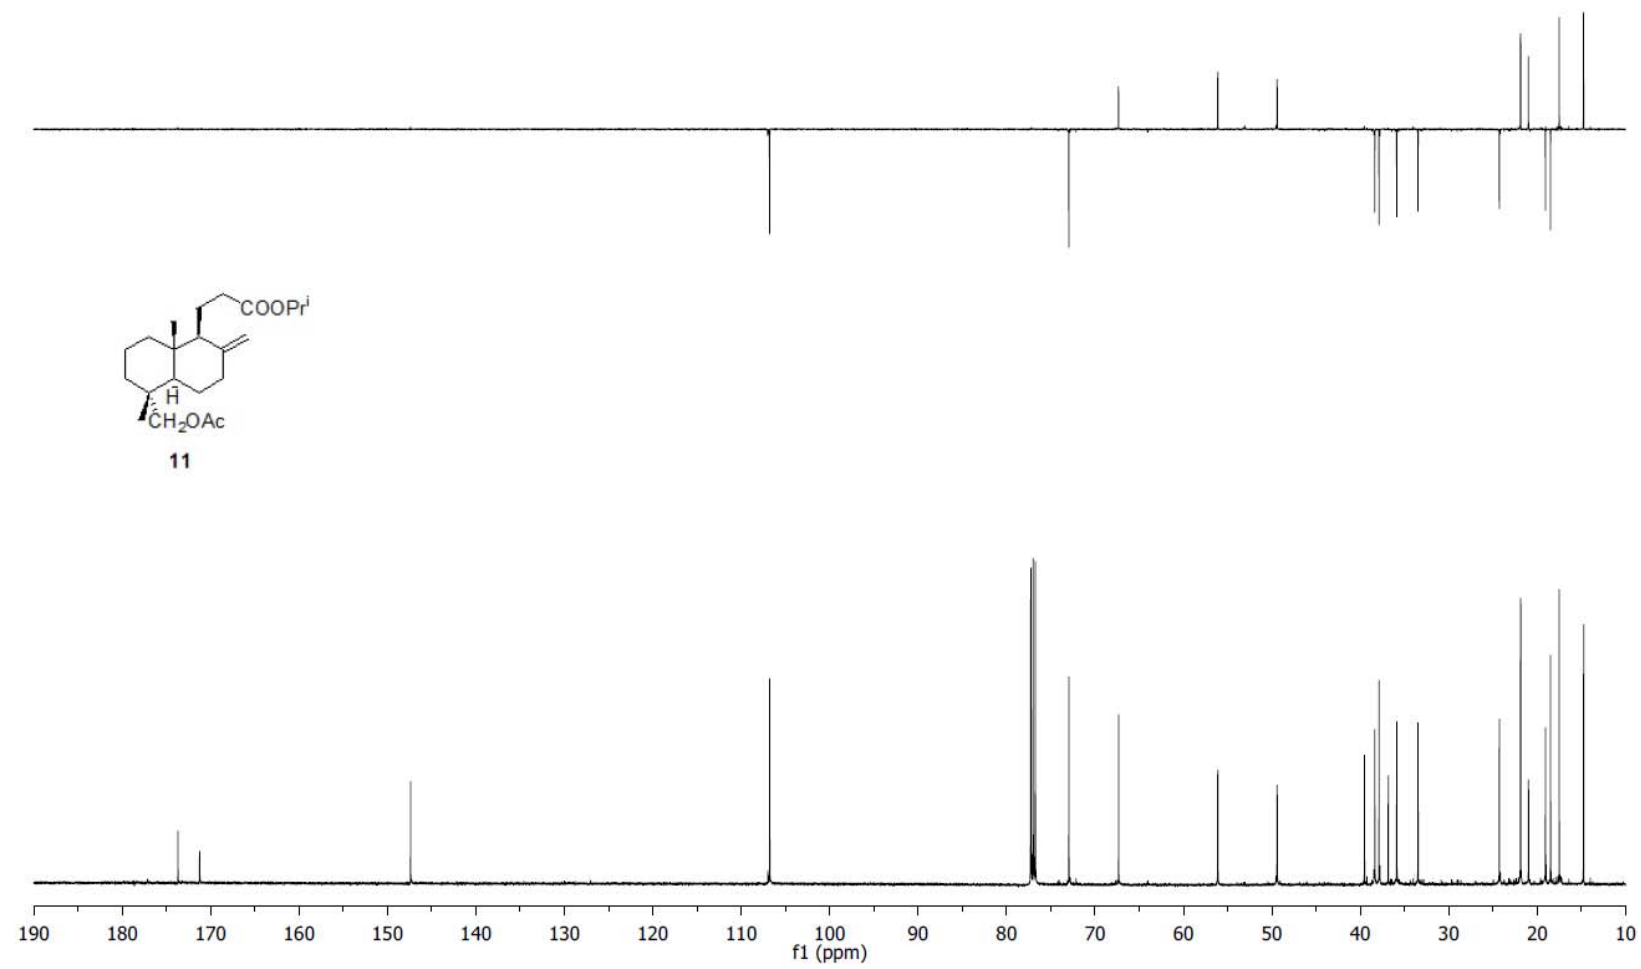

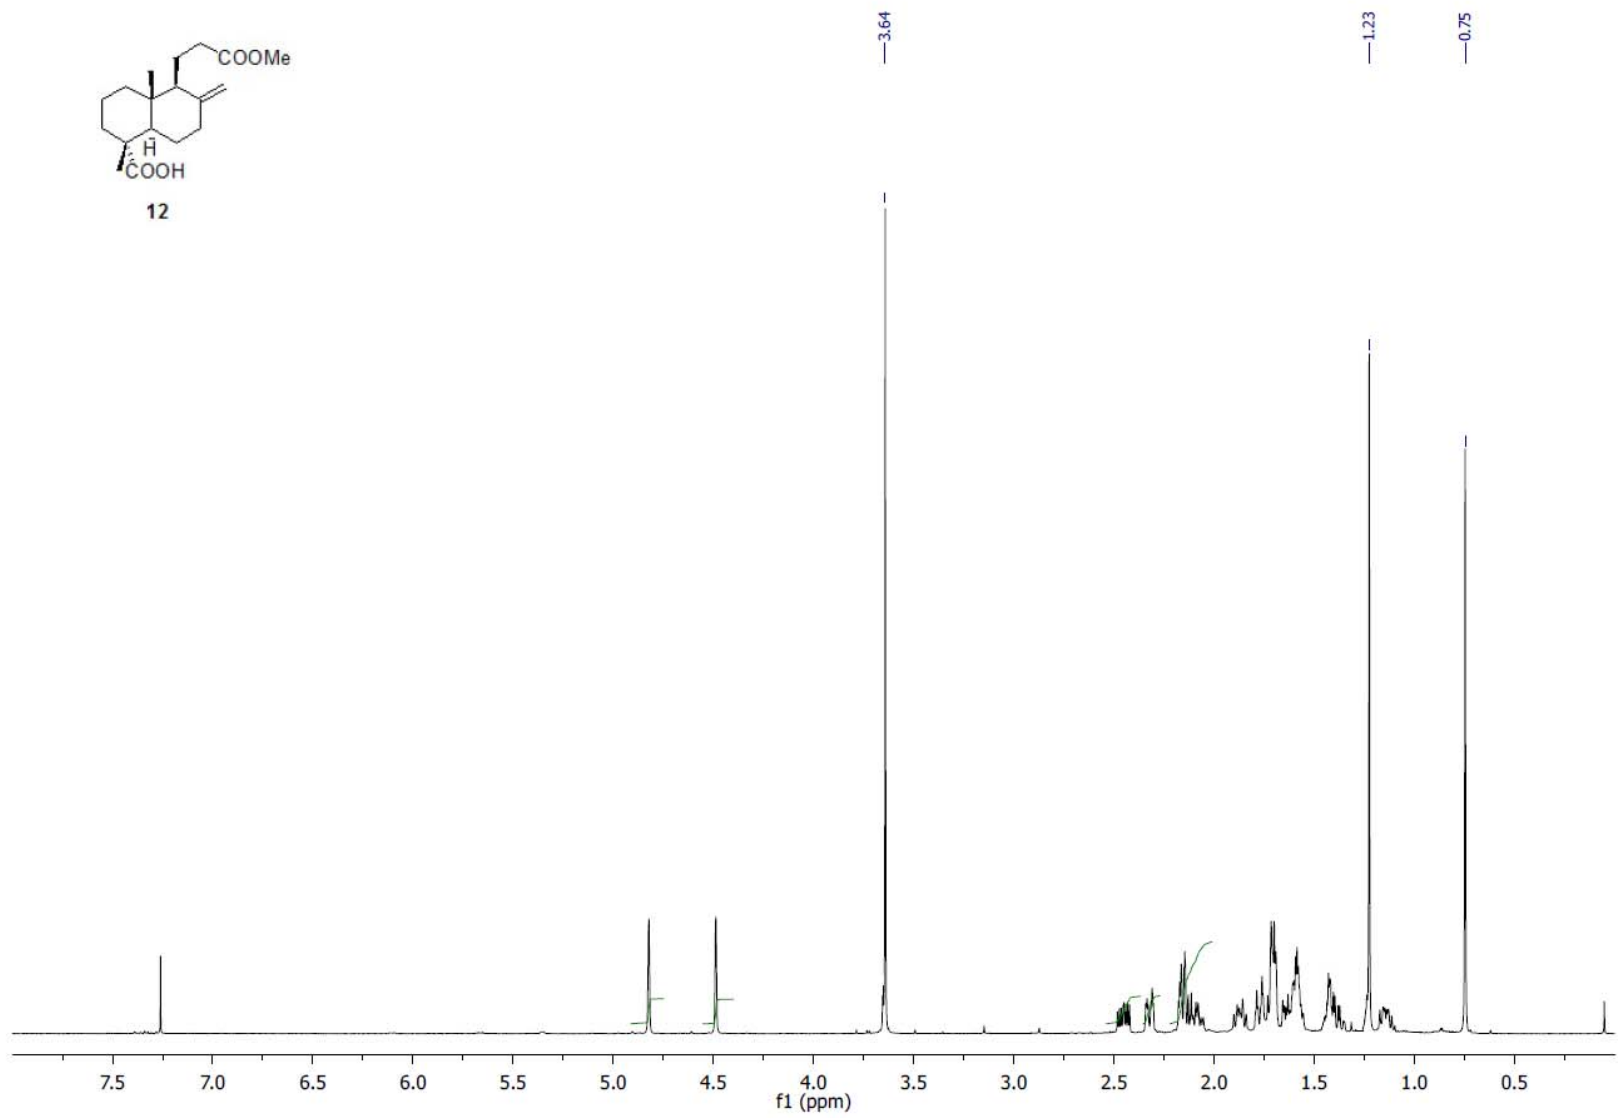

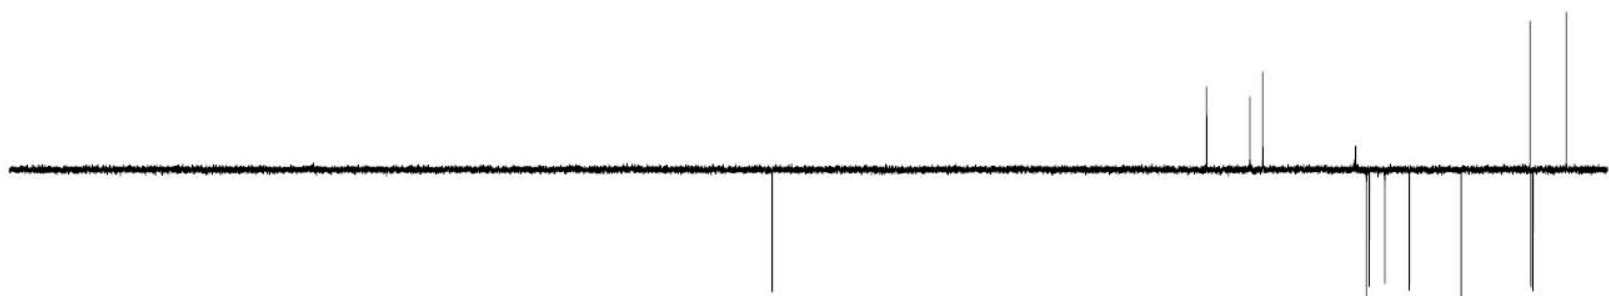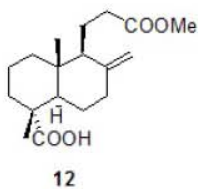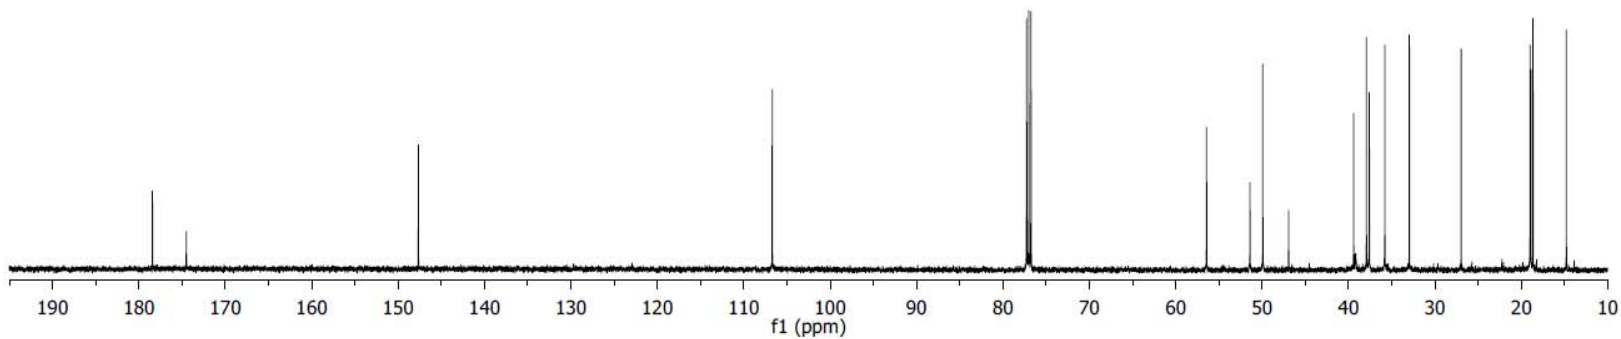

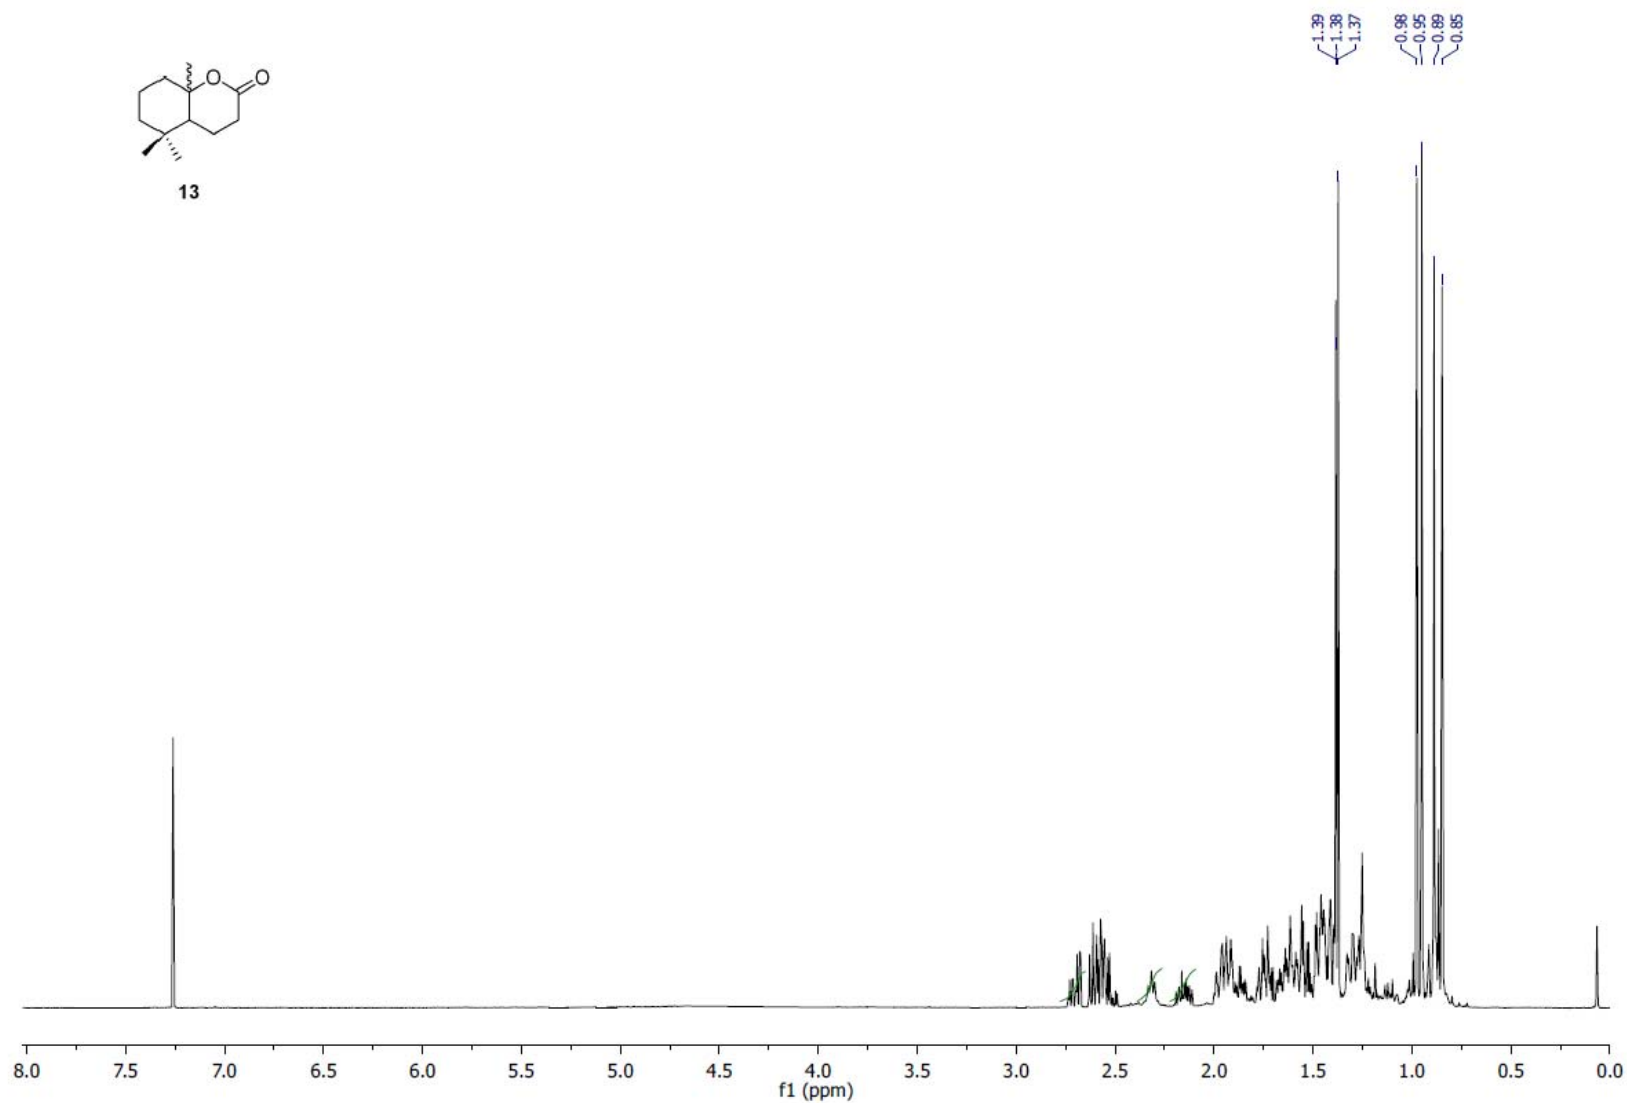

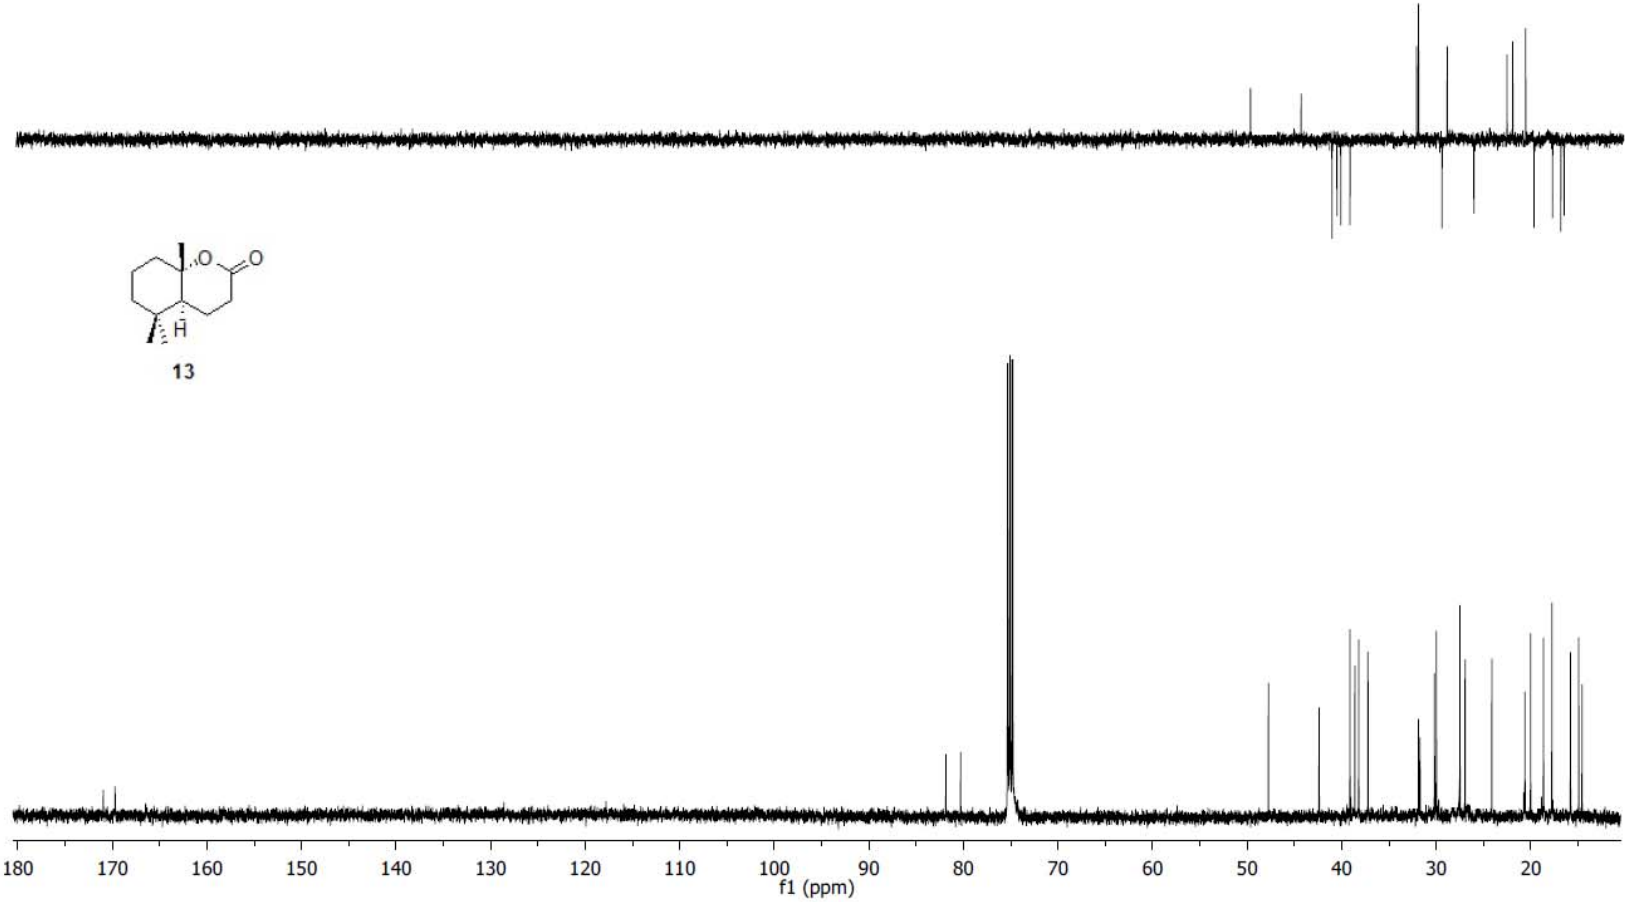

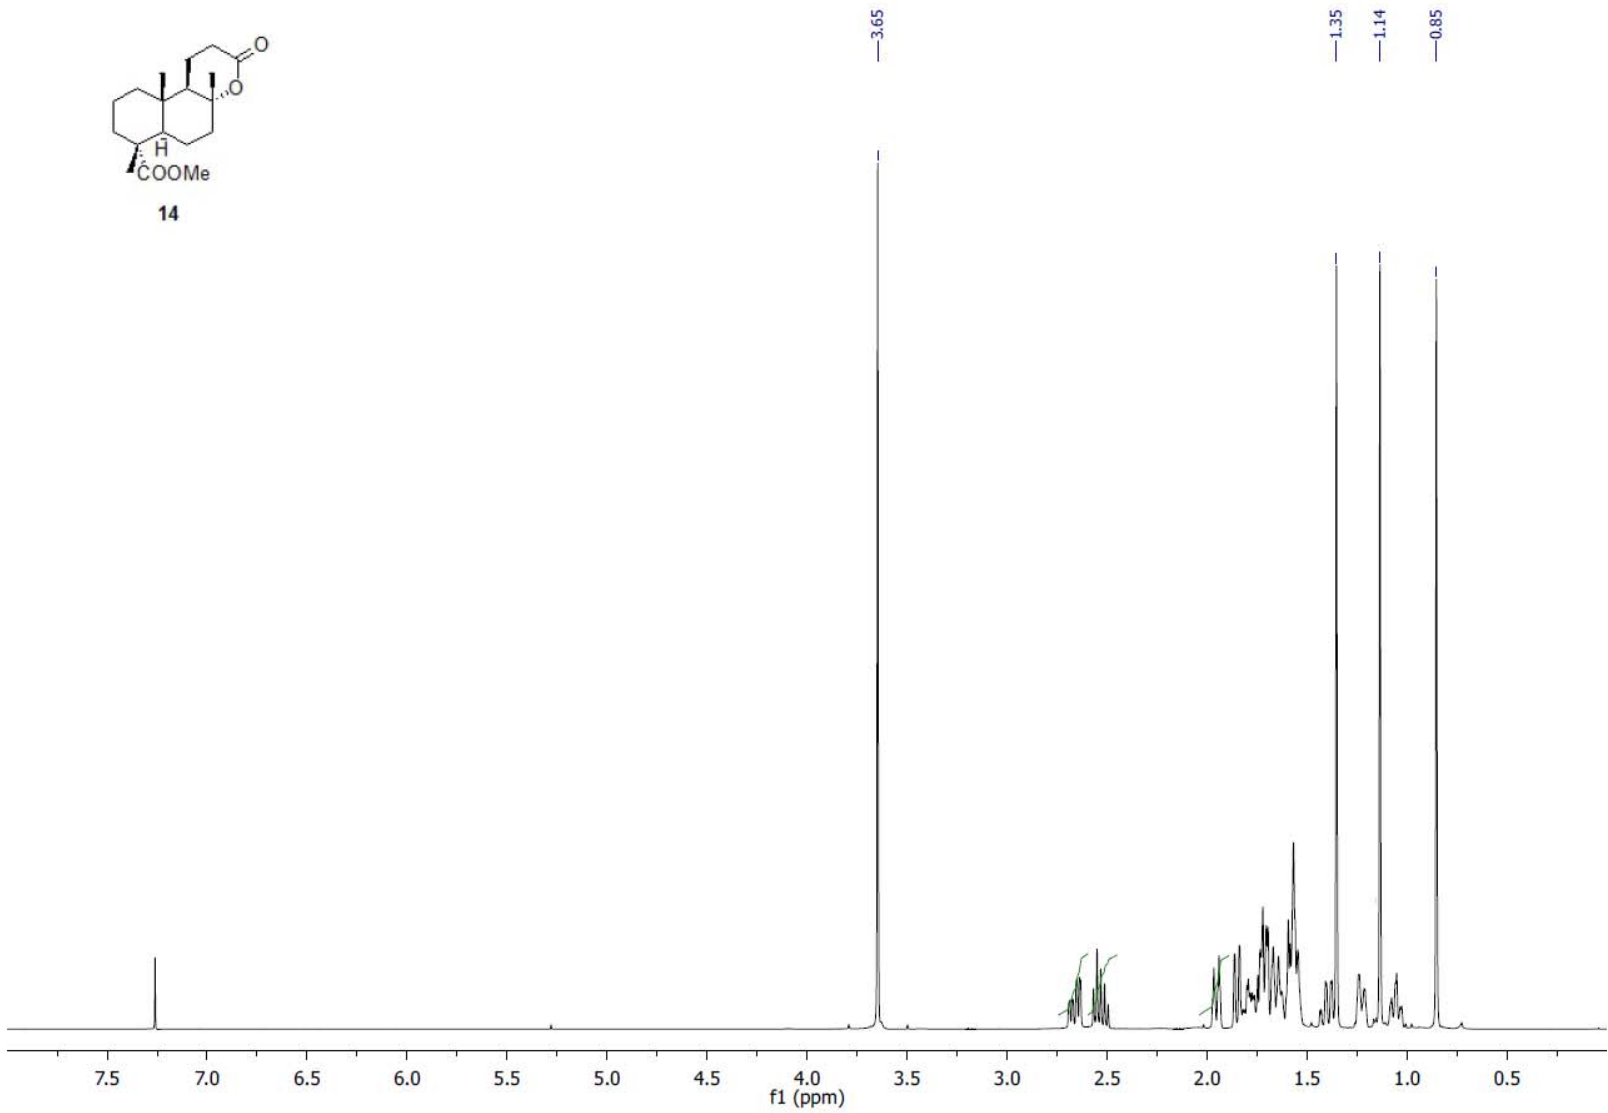



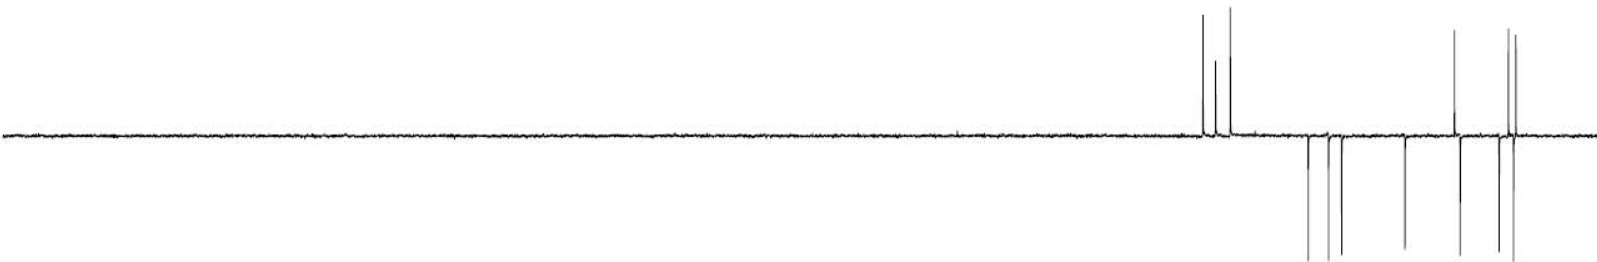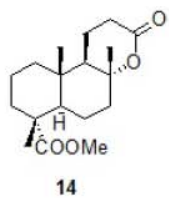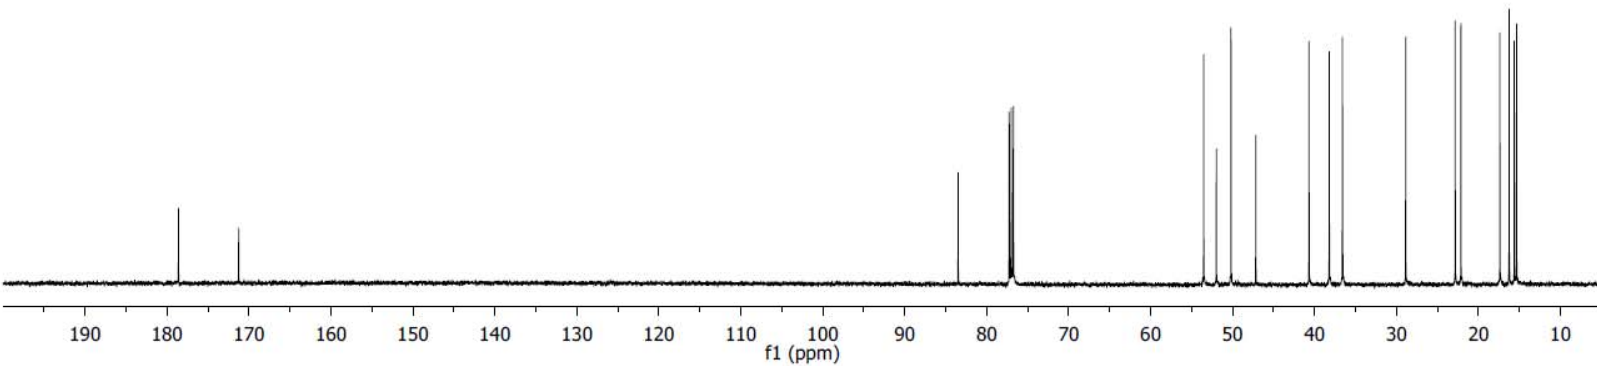

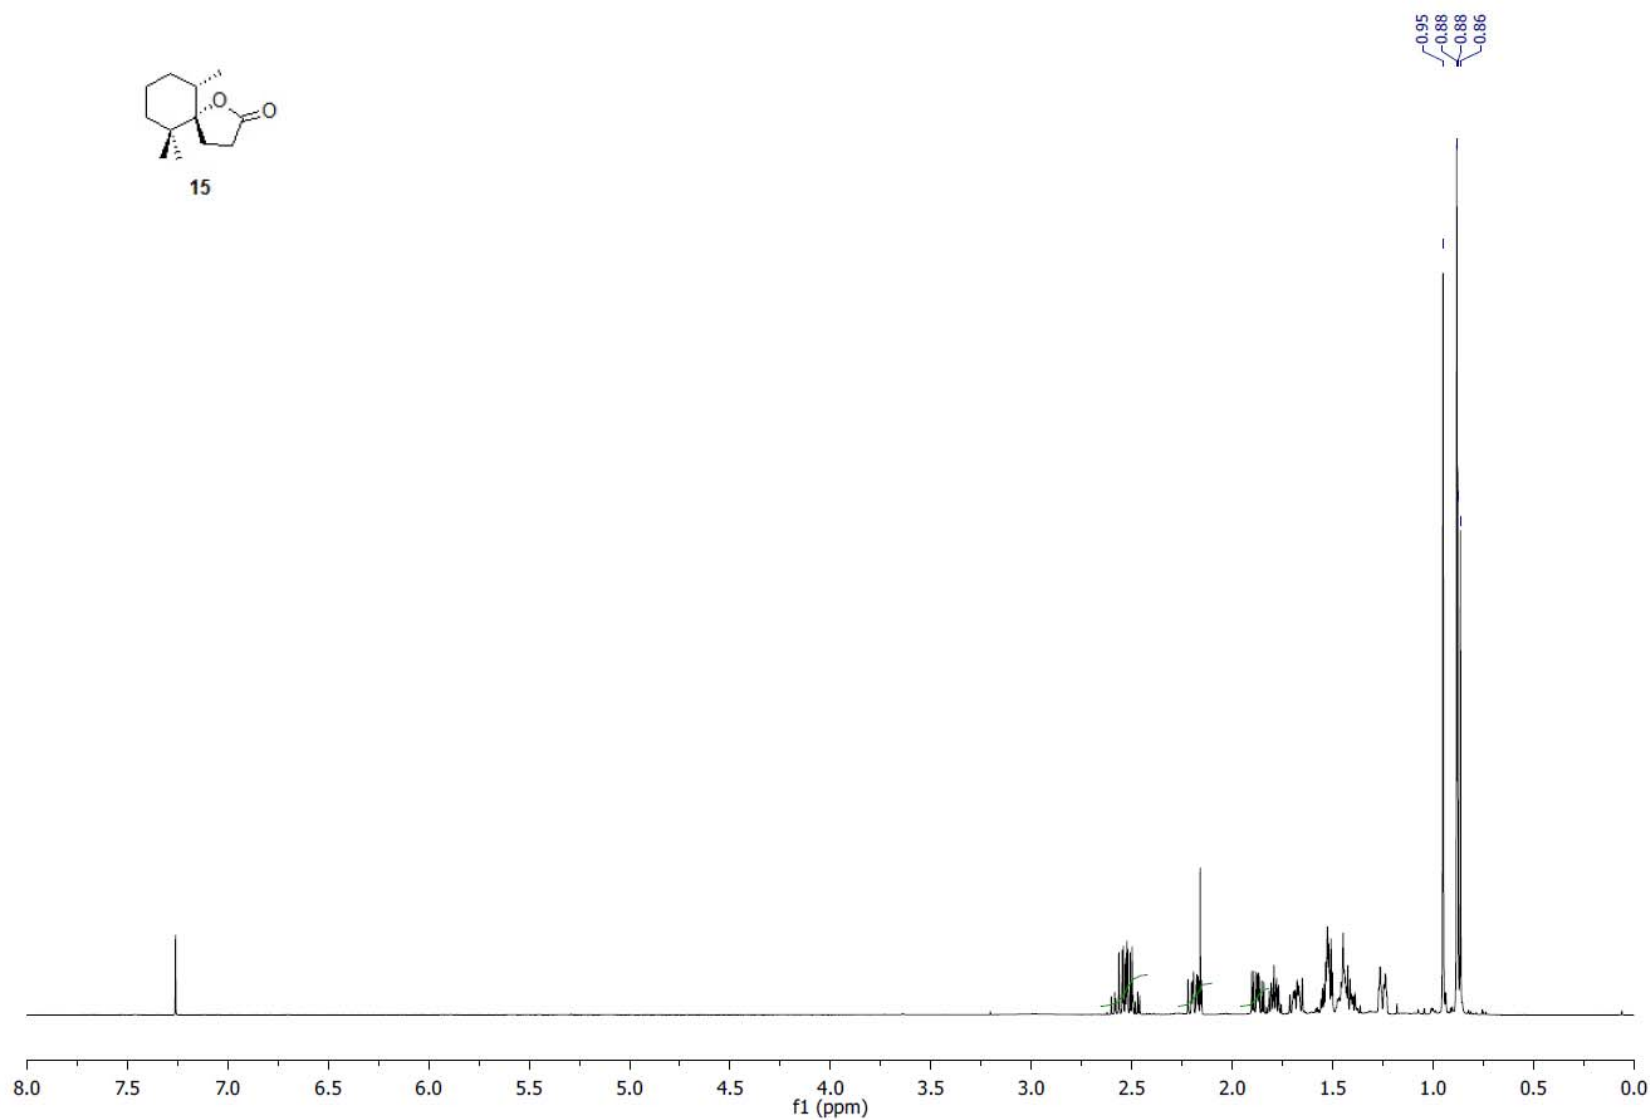

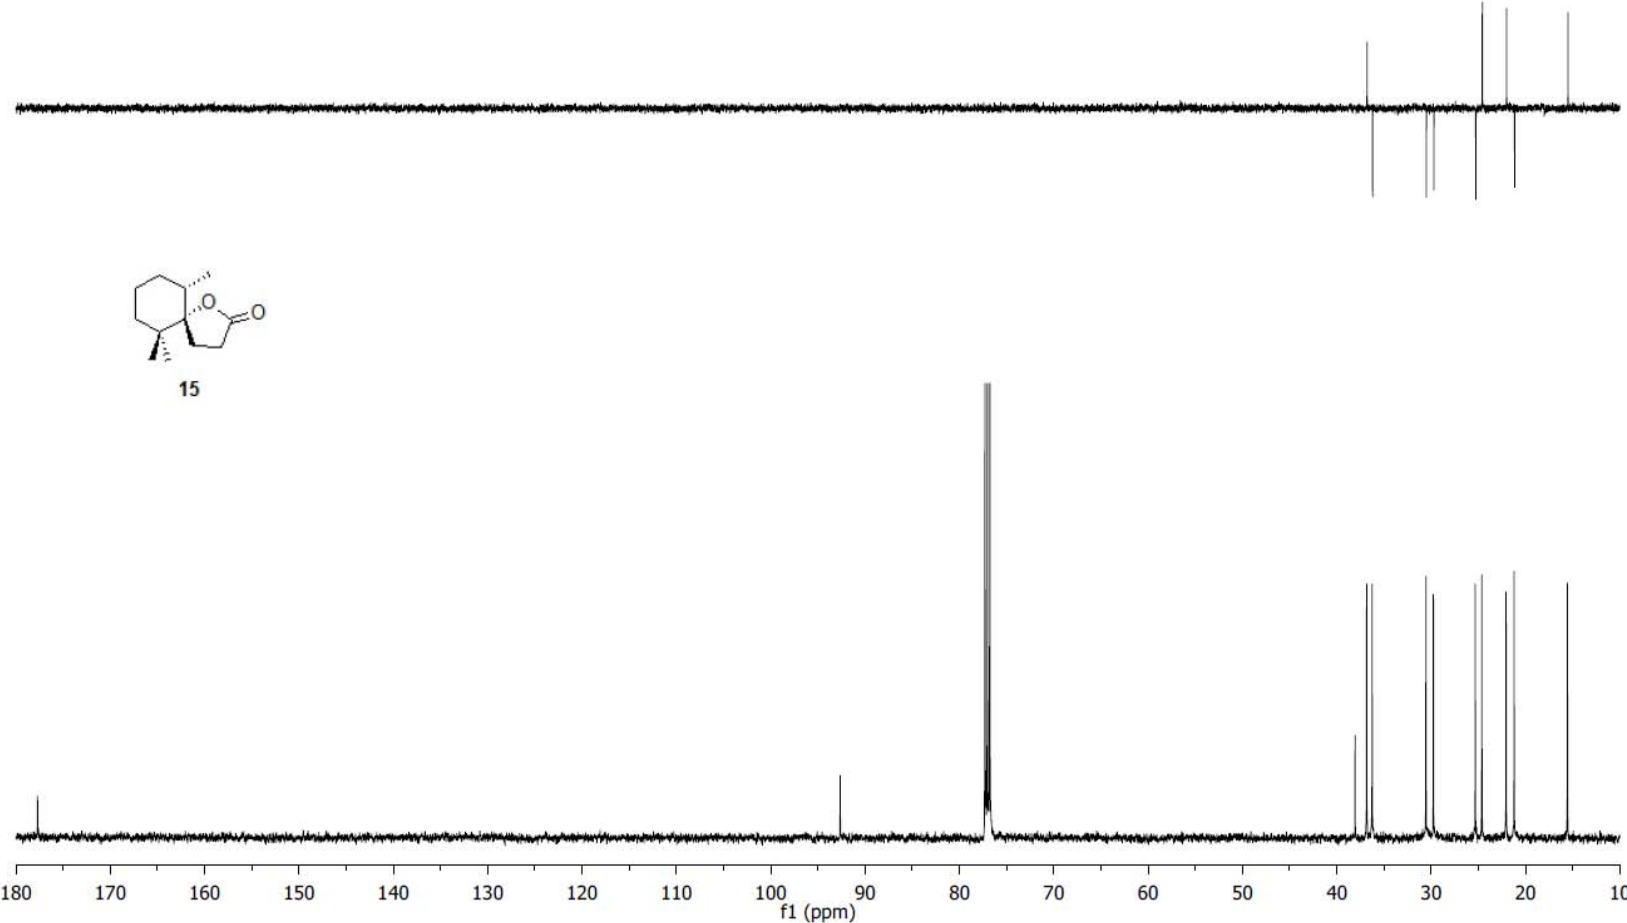

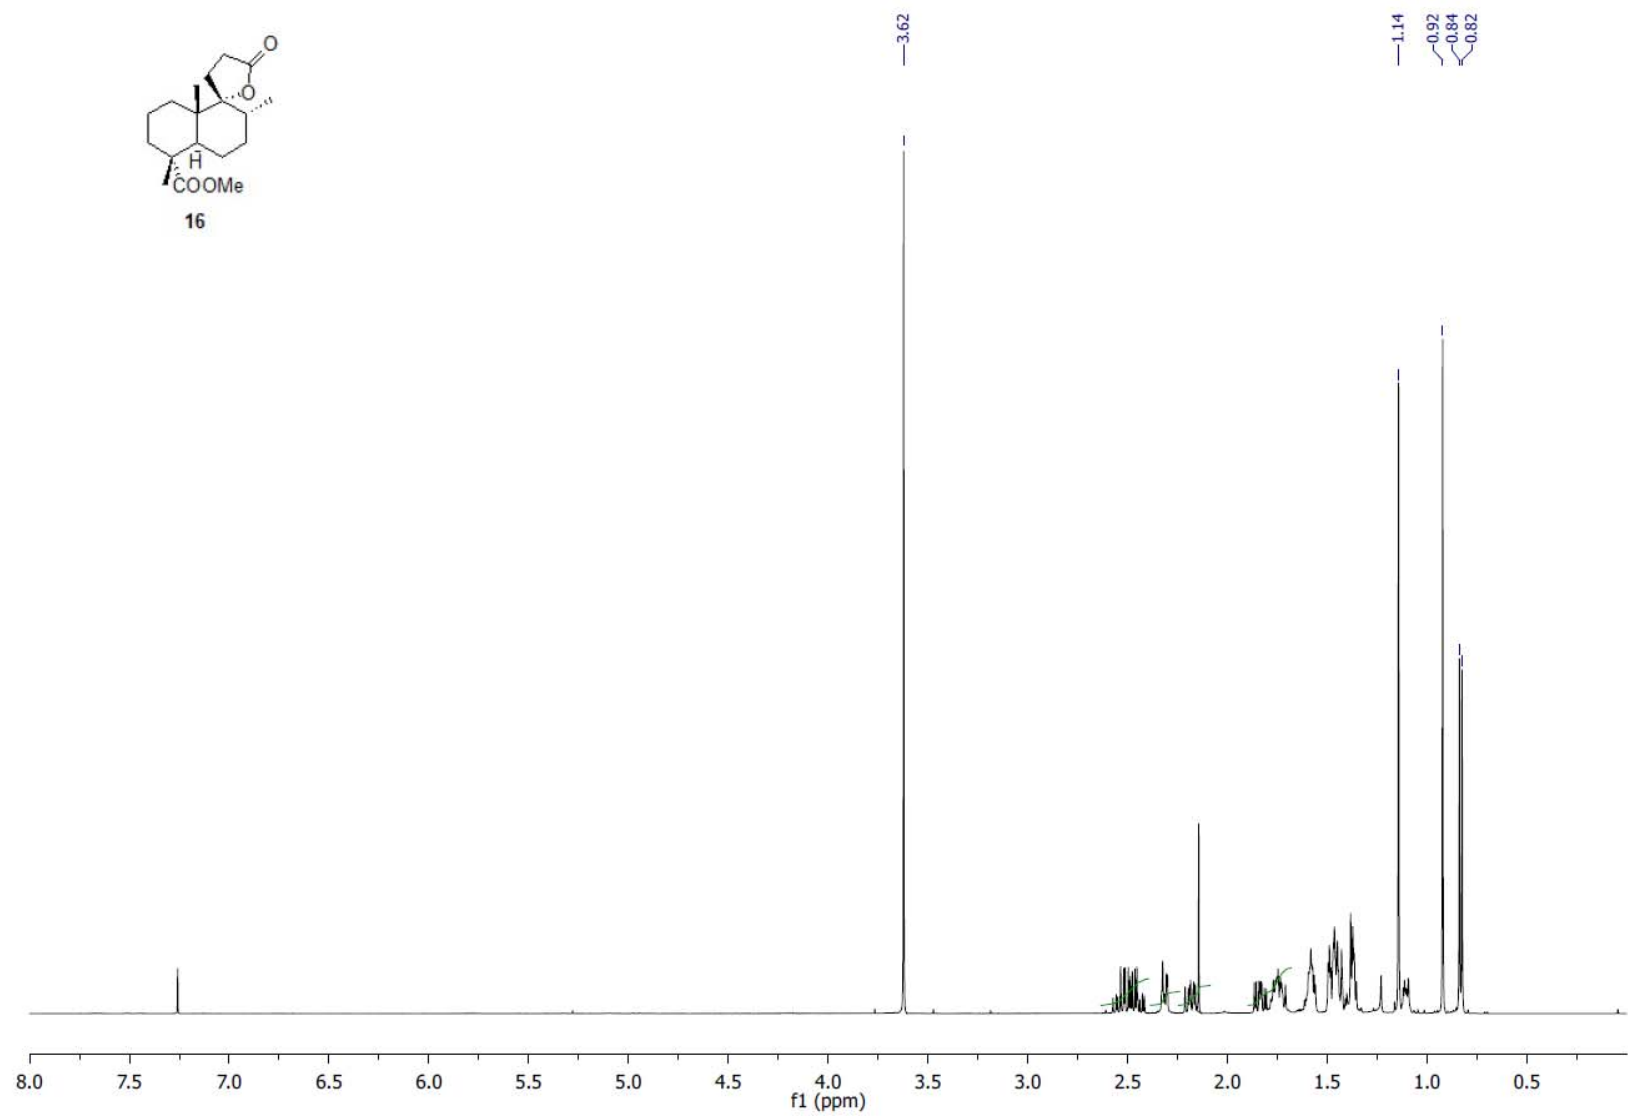

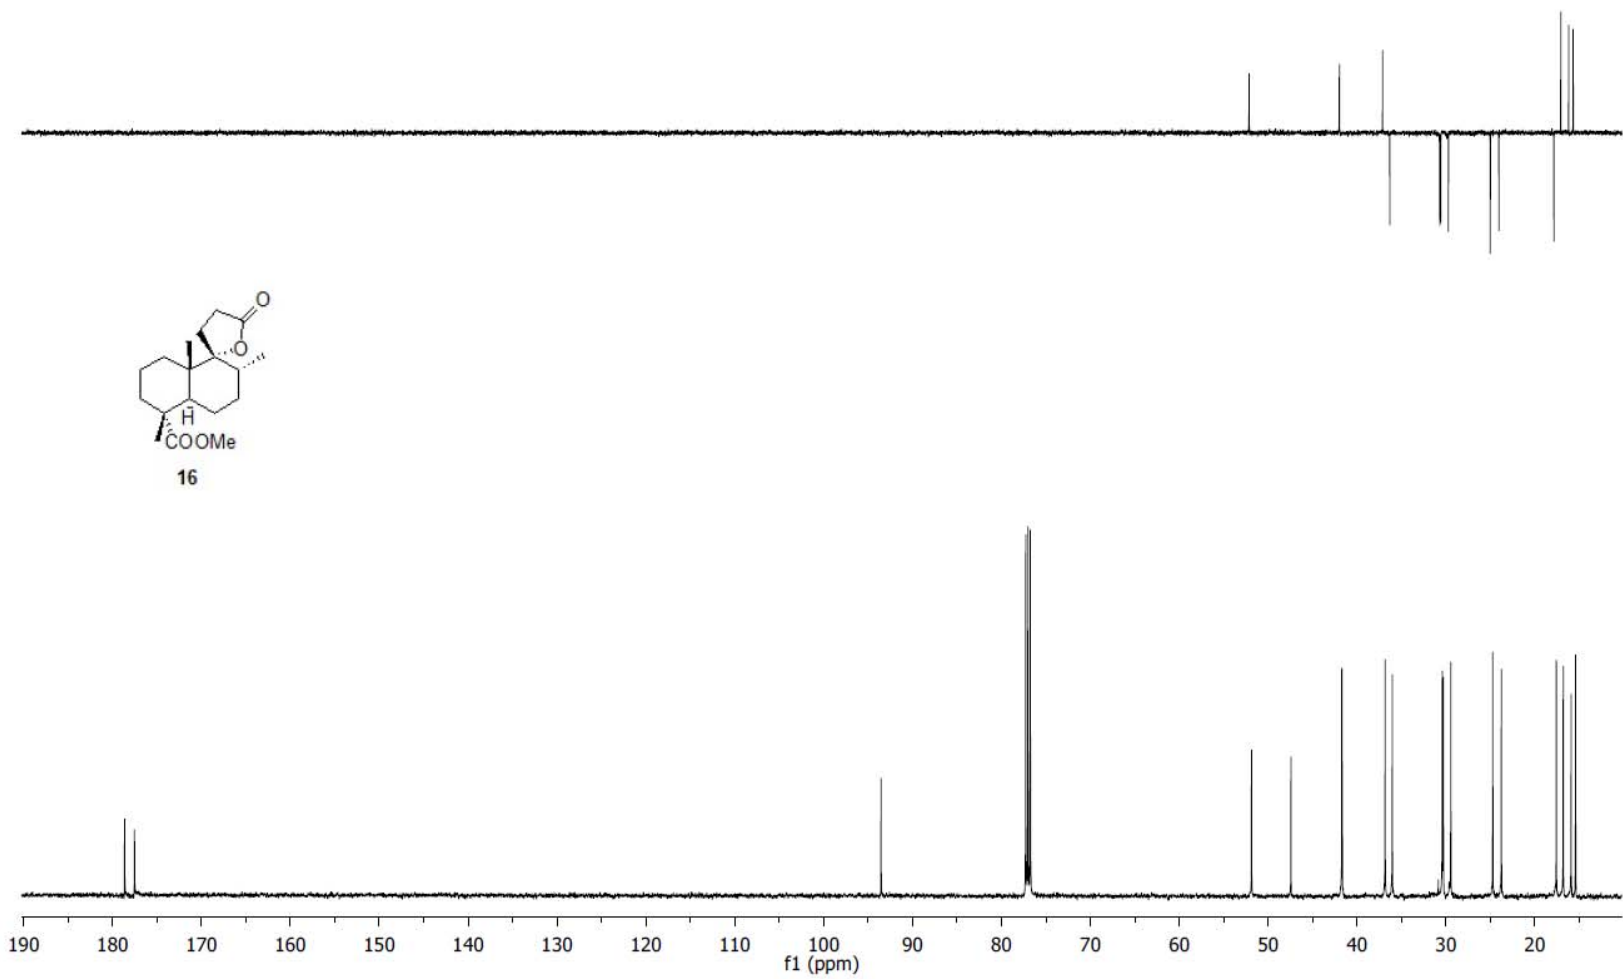

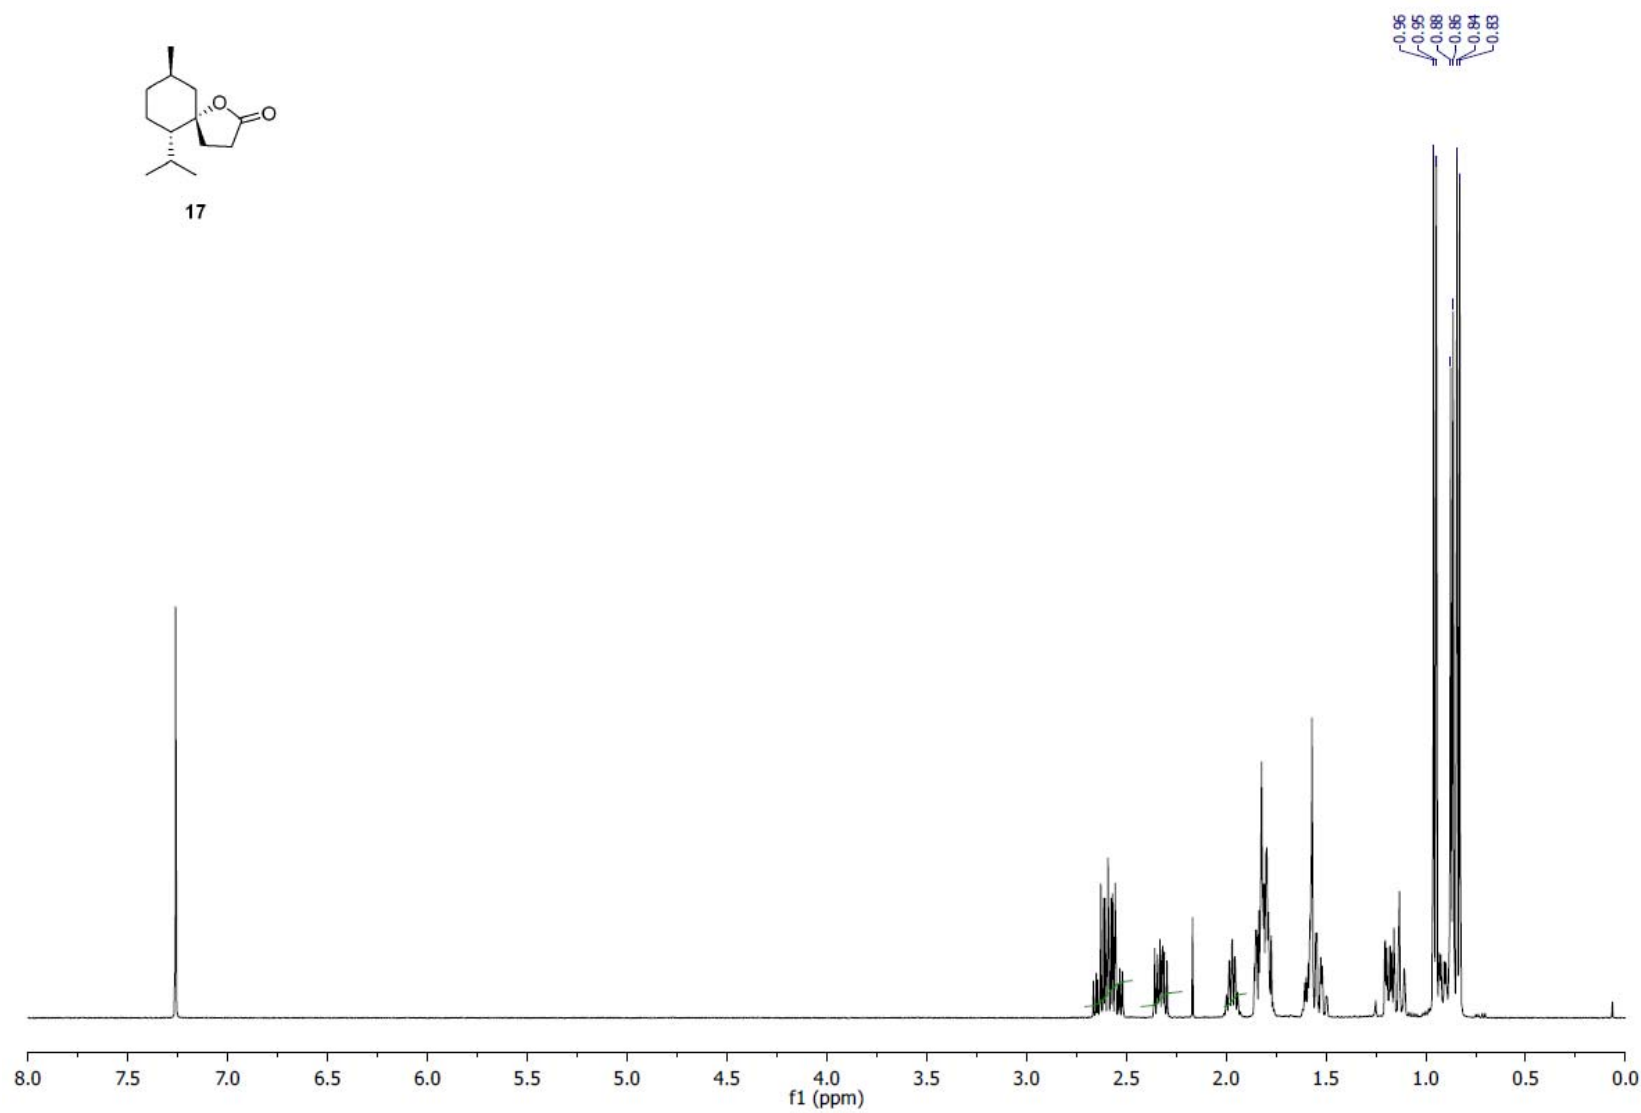

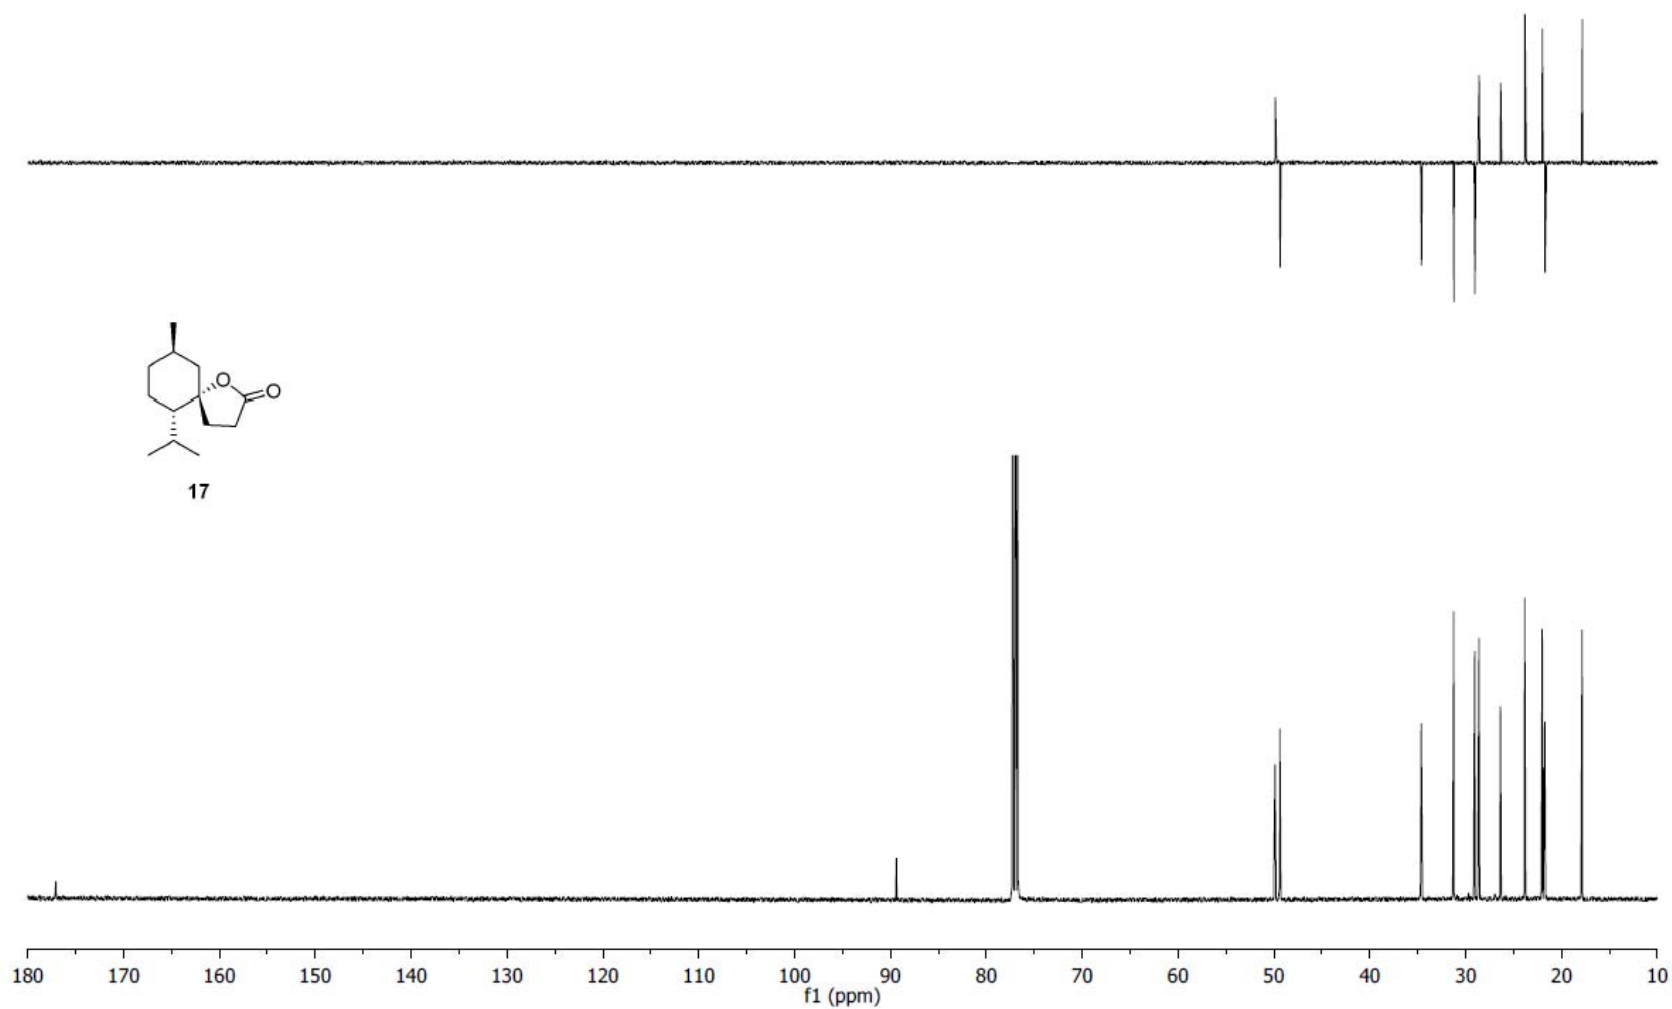

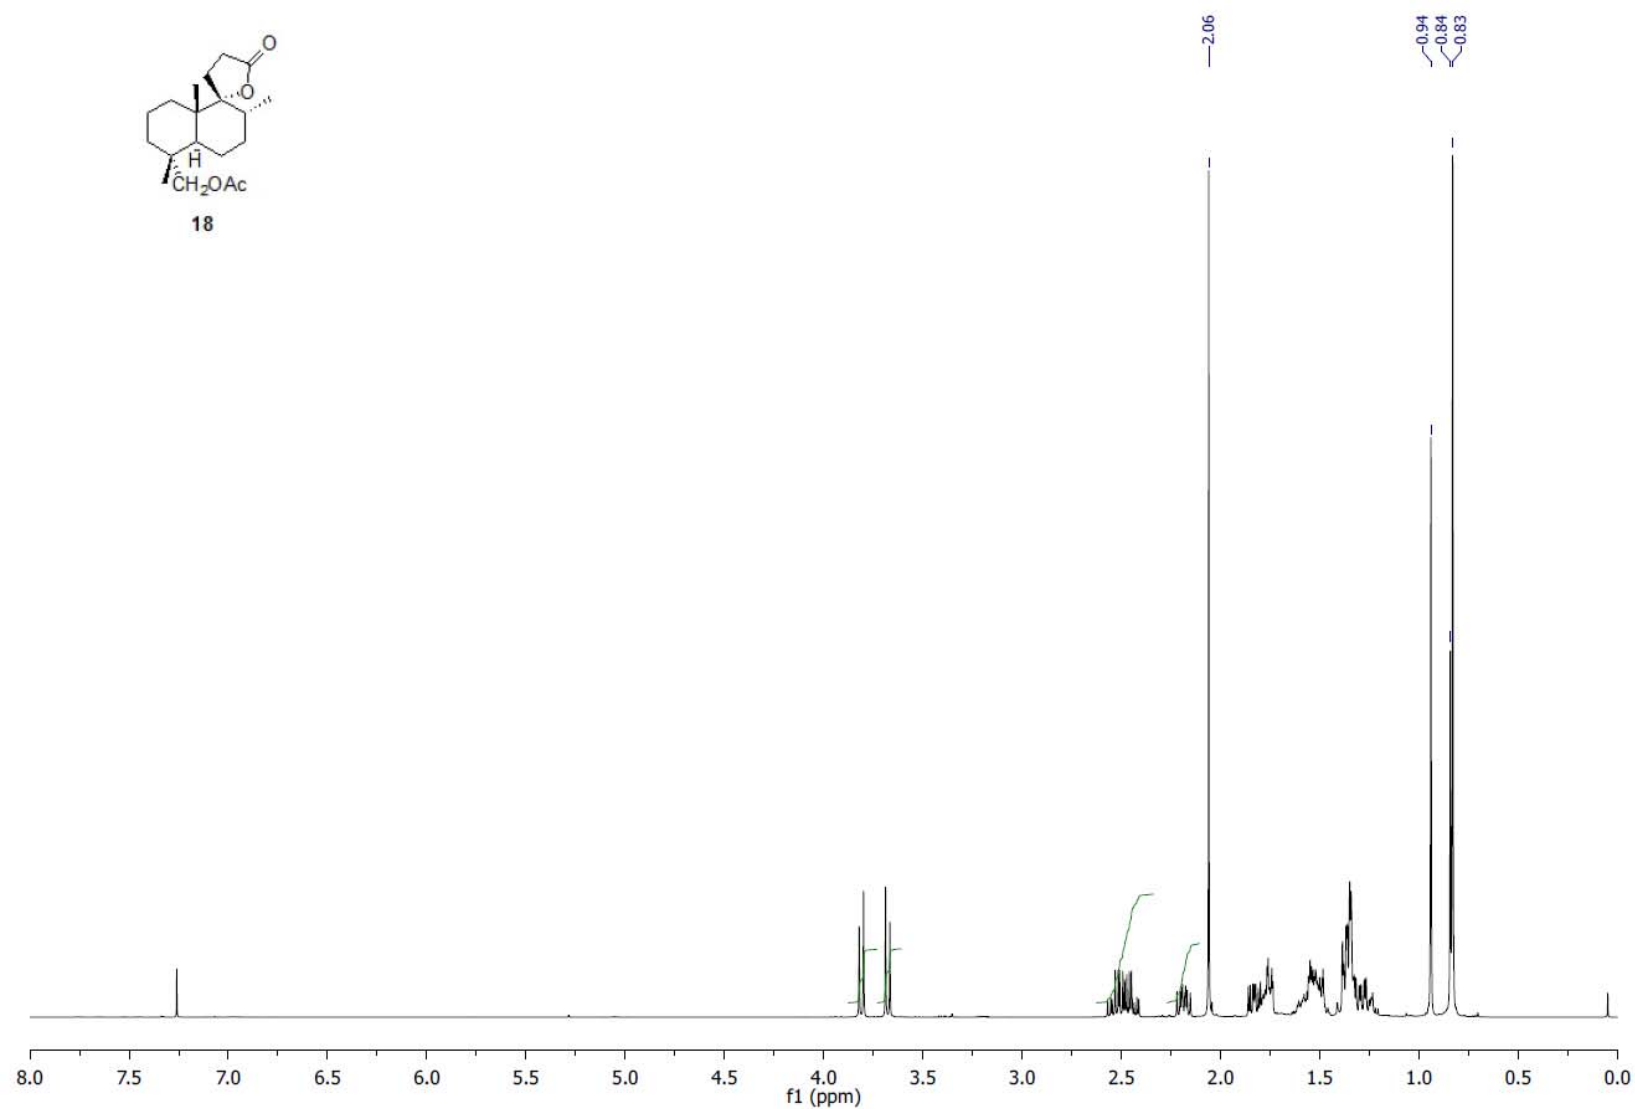



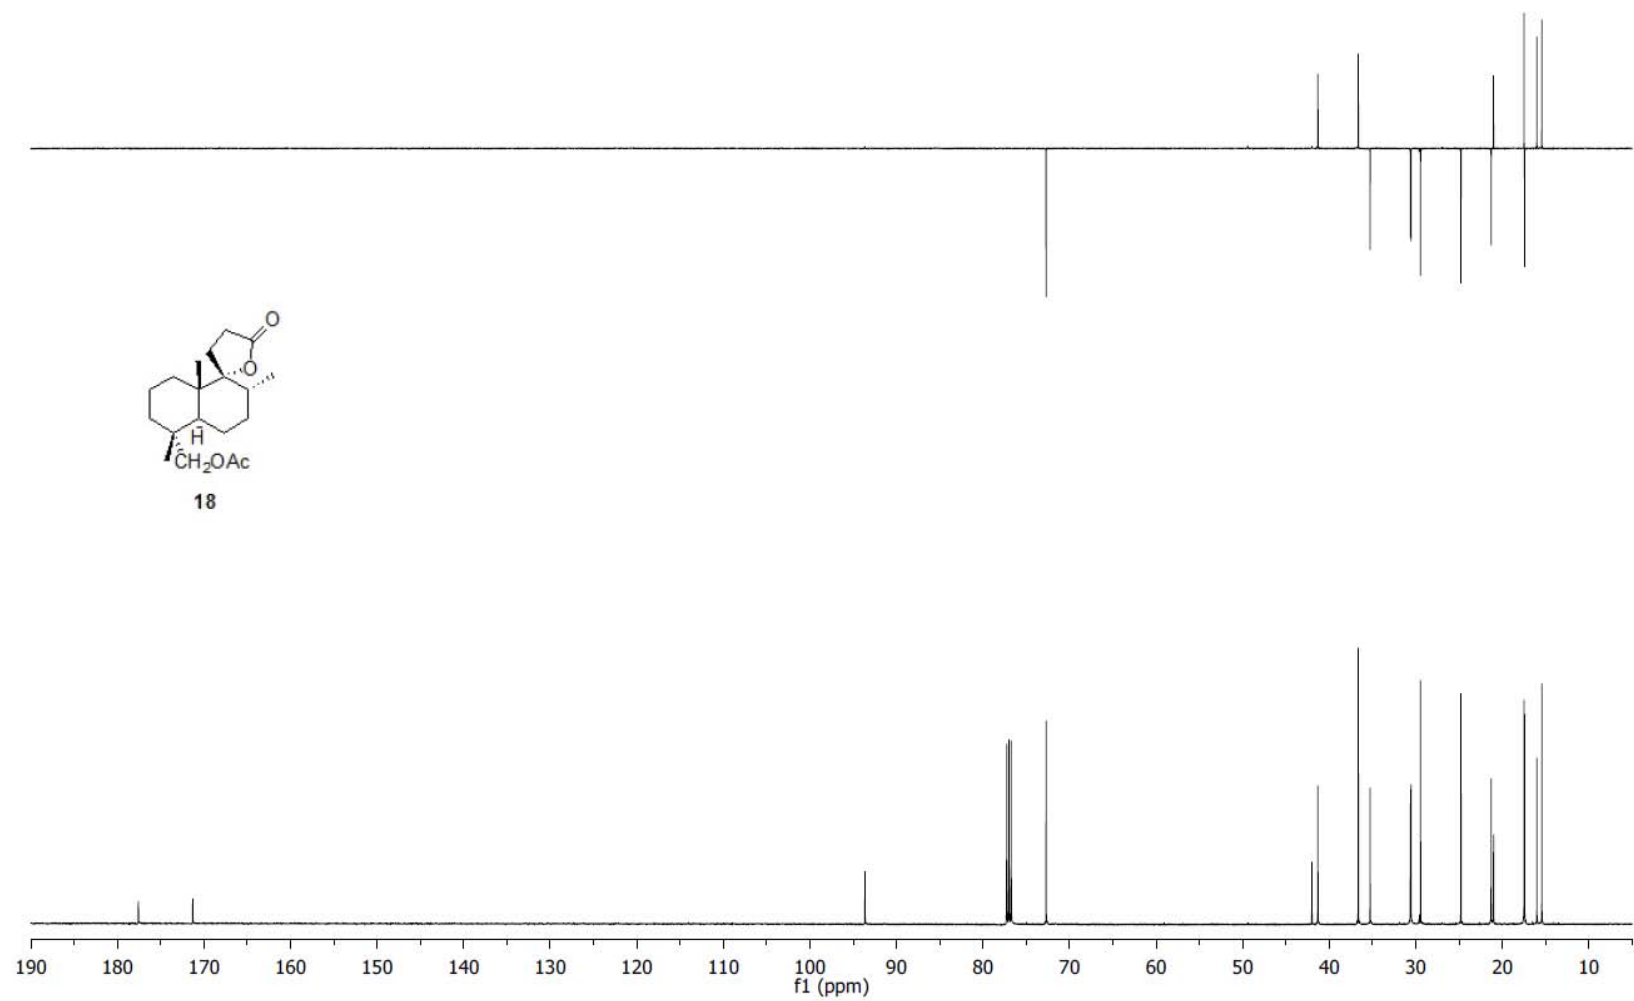

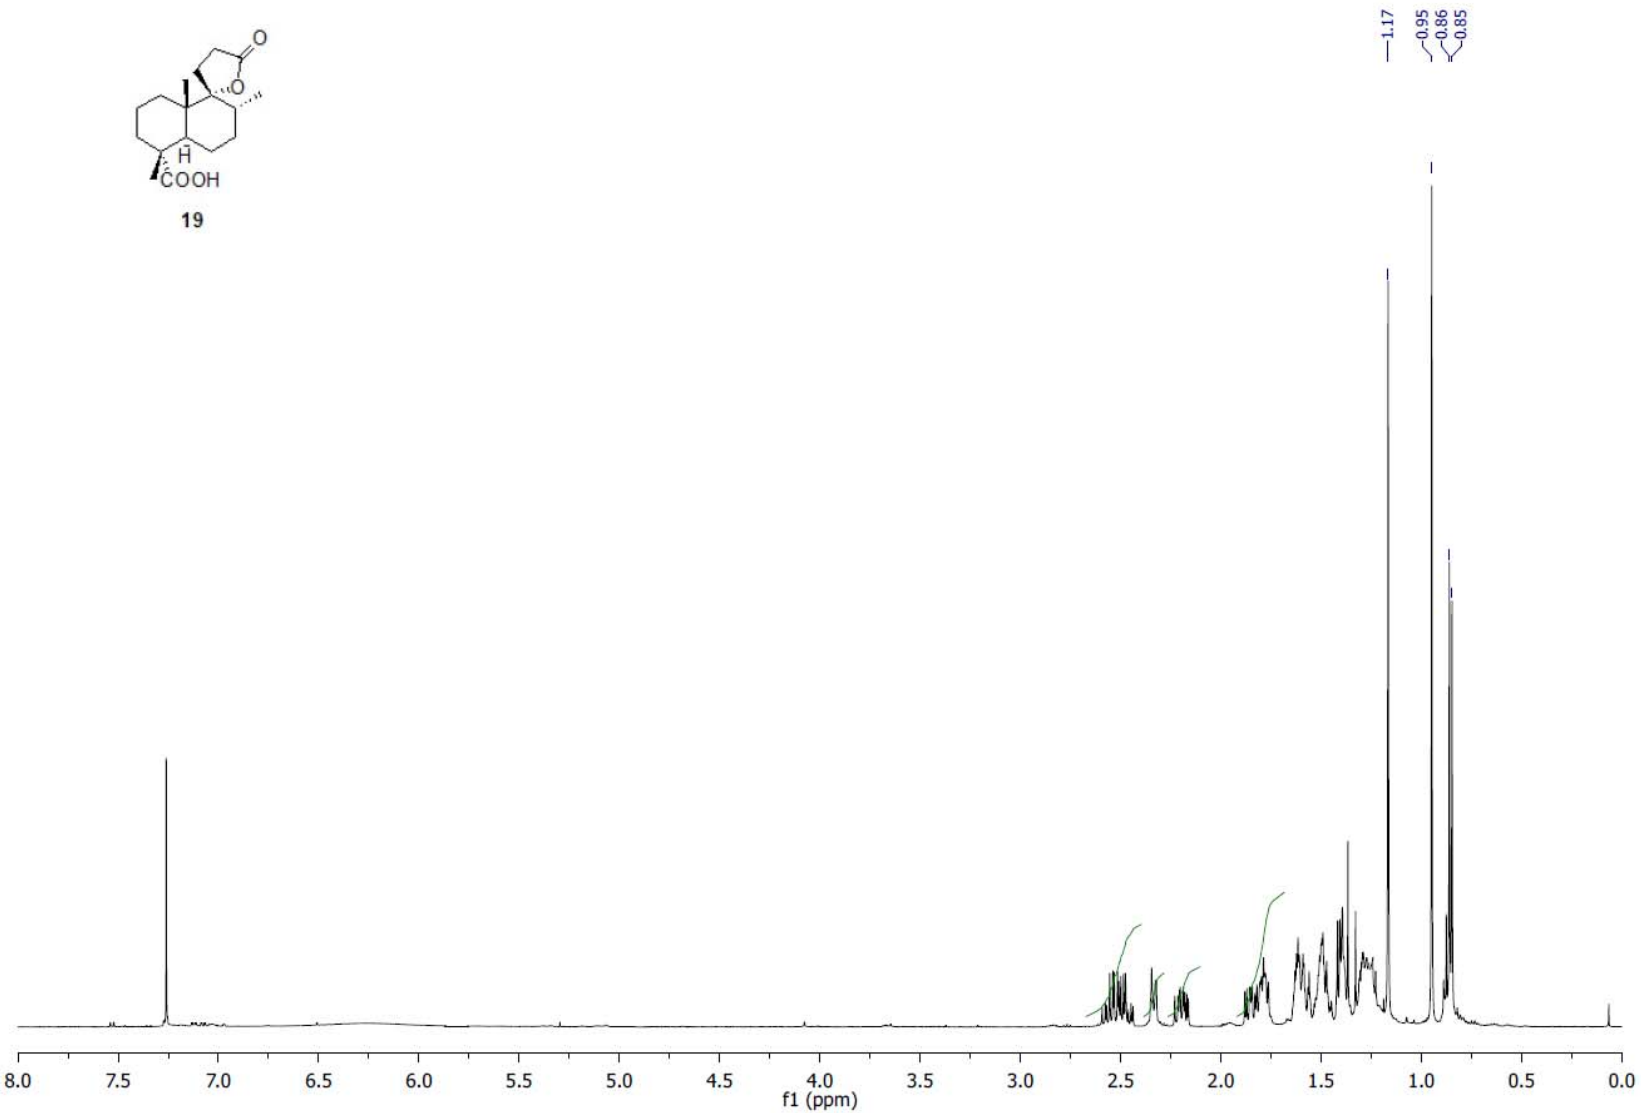

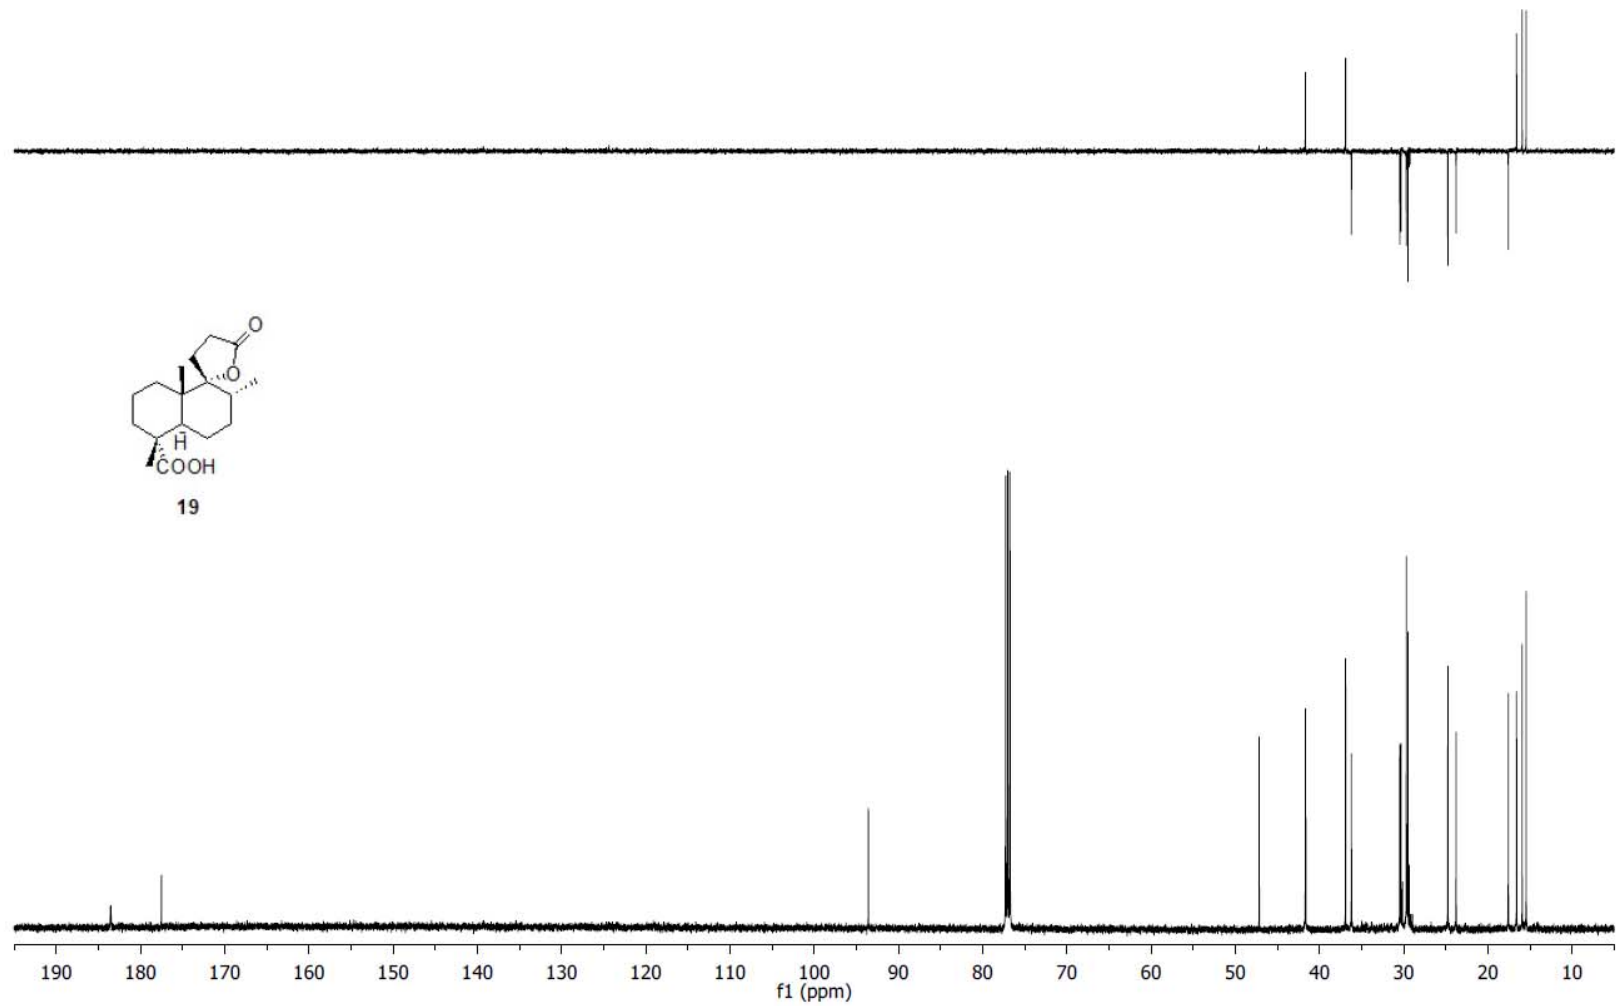

Supplement: c3ob42122h.pdf [file c3ob42122h.pdf]
